# Supplementary material for: Sarcosenones A–C, highly oxygenated pimarane diterpenoids from an endolichenic fungus Sarcosomataceae sp.
Source: Royal Society of Chemistry journal article supplement (doi:10.1039/d0ra02485f), 2020-01-01

## Supplementary Information

### **Sarcosenones A–C, highly oxygenated pimarane diterpenoids from an endolichenic fungus *Sarcosomataceae* sp.**

Xintong Hou,<sup>ab</sup> Yang Xu,<sup>b</sup> Shuaiming Zhu,<sup>c</sup> Yang Zhang,<sup>\*c</sup> Liangdong Guo,<sup>d</sup> Feng

Qiu<sup>a</sup> and Yongsheng Che<sup>\*ab</sup>

#### **Affiliation**

<sup>a</sup> Tianjin University of Traditional Chinese Medicine, Tianjin 300193, People's Republic of China

<sup>b</sup> Institute of Medicinal Biotechnology, Chinese Academy of Medical Sciences & Peking Union Medical College, Beijing 100730, People's Republic of China

<sup>c</sup> State Key Laboratory of Toxicology & Medical Countermeasures, Beijing Institute of Pharmacology & Toxicology, Beijing 100850, People's Republic of China

<sup>d</sup> State Key Laboratory of Mycology, Institute of Microbiology, Chinese Academy of Sciences, Beijing 100101, People's Republic of China

#### **Correspondence**

\* To whom correspondence should be addressed.

Yongsheng Che. E-mail: [cheys@im.ac.cn](mailto:cheys@im.ac.cn); Yang Zhang. E-mail: [zhangyang@bmi.ac.cn](mailto:zhangyang@bmi.ac.cn).

| <b>Contents</b>                                                                                                                             | <b>Page</b> |
|---------------------------------------------------------------------------------------------------------------------------------------------|-------------|
| 1) <b>Figure S1.</b> <sup>1</sup> H NMR spectrum of Sarcosenone A ( <b>1</b> ; 600 MHz, Acetone- <i>d</i> <sub>6</sub> )                    | 4           |
| 2) <b>Figure S2.</b> <sup>13</sup> C NMR spectrum of Sarcosenone A ( <b>1</b> ; 150 MHz, Acetone- <i>d</i> <sub>6</sub> )                   | 5           |
| 3) <b>Figure S3.</b> HSQC spectrum of Sarcosenone A ( <b>1</b> ; 600 MHz, Acetone- <i>d</i> <sub>6</sub> )                                  | 6           |
| 4) <b>Figure S4.</b> <sup>1</sup> H– <sup>1</sup> H COSY spectrum of Sarcosenone A ( <b>1</b> ; 600 MHz, Acetone- <i>d</i> <sub>6</sub> )   | 7           |
| 5) <b>Figure S5.</b> HMBC spectrum of Sarcosenone A ( <b>1</b> ; 600 MHz, Acetone- <i>d</i> <sub>6</sub> )                                  | 8           |
| 6) <b>Figure S6.</b> NOESY spectrum of Sarcosenone A ( <b>1</b> ; 600 MHz, Acetone- <i>d</i> <sub>6</sub> )                                 | 9           |
| 7) <b>Figure S7.</b> HRESIMS spectrum of Sarcosenone A ( <b>1</b> )                                                                         | 10          |
| 8) <b>Figure S8.</b> IR spectrum of Sarcosenone A ( <b>1</b> )                                                                              | 11          |
| 9) <b>Figure S9.</b> UV spectrum of Sarcosenone A ( <b>1</b> ) in MeOH                                                                      | 12          |
| 10) <b>Figure S10.</b> Experimental CD spectrum of Sarcosenone A ( <b>1</b> ) in MeOH                                                       | 12          |
| 11) <b>Figure S11.</b> Relative configurations and the optimized conformers for <b>1</b>                                                    | 13          |
| 12) <b>Figure S12.</b> <sup>1</sup> H NMR spectrum of Sarcosenone B ( <b>2</b> ; 600 MHz, Acetone- <i>d</i> <sub>6</sub> )                  | 14          |
| 13) <b>Figure S13.</b> <sup>13</sup> C NMR spectrum of Sarcosenone B ( <b>2</b> ; 150 MHz, Acetone- <i>d</i> <sub>6</sub> )                 | 15          |
| 14) <b>Figure S14.</b> HSQC spectrum of Sarcosenone B ( <b>2</b> ; 600 MHz, Acetone- <i>d</i> <sub>6</sub> )                                | 16          |
| 15) <b>Figure S15.</b> <sup>1</sup> H– <sup>1</sup> H COSY spectrum of Sarcosenone B ( <b>2</b> ; 600 MHz, Acetone- <i>d</i> <sub>6</sub> ) | 17          |
| 16) <b>Figure S16.</b> HMBC spectrum of Sarcosenone B ( <b>2</b> ; 600 MHz, Acetone- <i>d</i> <sub>6</sub> )                                | 18          |
| 17) <b>Figure S17.</b> NOESY spectrum of Sarcosenone B ( <b>2</b> ; 600 MHz, Acetone- <i>d</i> <sub>6</sub> )                               | 19          |
| 18) <b>Figure S18.</b> HRESIMS spectrum of Sarcosenone B ( <b>2</b> )                                                                       | 20          |
| 19) <b>Figure S19.</b> IR spectrum of Sarcosenone B ( <b>2</b> )                                                                            | 21          |
| 20) <b>Figure S20.</b> UV spectrum of Sarcosenone B ( <b>2</b> ) in MeOH                                                                    | 22          |
| 21) <b>Figure S21.</b> Experimental CD spectrum of Sarcosenone B ( <b>2</b> ) in MeOH                                                       | 22          |

|                                                                                                                                                              |       |
|--------------------------------------------------------------------------------------------------------------------------------------------------------------|-------|
| 22) <b>Figure S22.</b> Relative configurations and the optimized conformers for <b>2</b>                                                                     | 23    |
| 23) <b>Figure S23.</b> <sup>1</sup> H NMR spectrum of Sarcosenone C ( <b>3</b> ; 600 MHz, CDCl <sub>3</sub> )                                                | 24    |
| 24) <b>Figure S24.</b> <sup>13</sup> C NMR spectrum of Sarcosenone C ( <b>3</b> ; 150 MHz, CDCl <sub>3</sub> )                                               | 25    |
| 25) <b>Figure S25.</b> HSQC spectrum of Sarcosenone C ( <b>3</b> ; 600 MHz, CDCl <sub>3</sub> )                                                              | 26    |
| 26) <b>Figure S26.</b> <sup>1</sup> H– <sup>1</sup> H COSY spectrum of Sarcosenone C ( <b>3</b> ; 600 MHz, CDCl <sub>3</sub> )                               | 27    |
| 27) <b>Figure S27.</b> HMBC spectrum of Sarcosenone C ( <b>3</b> ; 600 MHz, CDCl <sub>3</sub> )                                                              | 28    |
| 28) <b>Figure S28.</b> NOESY spectrum of Sarcosenone C ( <b>3</b> ; 600 MHz, CDCl <sub>3</sub> )                                                             | 29    |
| 29) <b>Figure S29.</b> HRESIMS spectrum of Sarcosenone C ( <b>3</b> )                                                                                        | 30    |
| 30) <b>Figure S30.</b> IR spectrum of Sarcosenone C ( <b>3</b> )                                                                                             | 31    |
| 31) <b>Figure S31.</b> UV spectrum of Sarcosenone C ( <b>3</b> ) in MeOH                                                                                     | 32    |
| 32) <b>Figure S32.</b> Experimental CD spectrum of Sarcosenone C ( <b>3</b> ) in MeOH                                                                        | 32    |
| 33) <b>Figure S33.</b> Relative configurations and the optimized conformers for <b>3</b>                                                                     | 33    |
| 34) <b>Figure S34.</b> NOESY spectrum of 9 $\alpha$ -Hydroxy-1,8(14),15-isopimaratrien -3,7,11-trione ( <b>4</b> ; 600 MHz, Acetone- <i>d</i> <sub>6</sub> ) | 34    |
| 35) <b>Figure S35.</b> Experimental CD spectrum of 9 $\alpha$ -Hydroxy -1,8(14),15-isopimaratrien -3,7,11-trione ( <b>4</b> ) in MeOH                        | 35    |
| 36) <b>Figure S36.</b> Relative configurations and the optimized conformers for <b>4</b>                                                                     | 36,37 |
| 37) <b>Scheme S1.</b> Hypothetical biosynthetic pathways for <b>1–4</b>                                                                                      | 38    |

**Figure S1.**  $^1\text{H}$  NMR Spectrum of Sarcosenone A (**1**; 600 MHz, Acetone- $d_6$ )

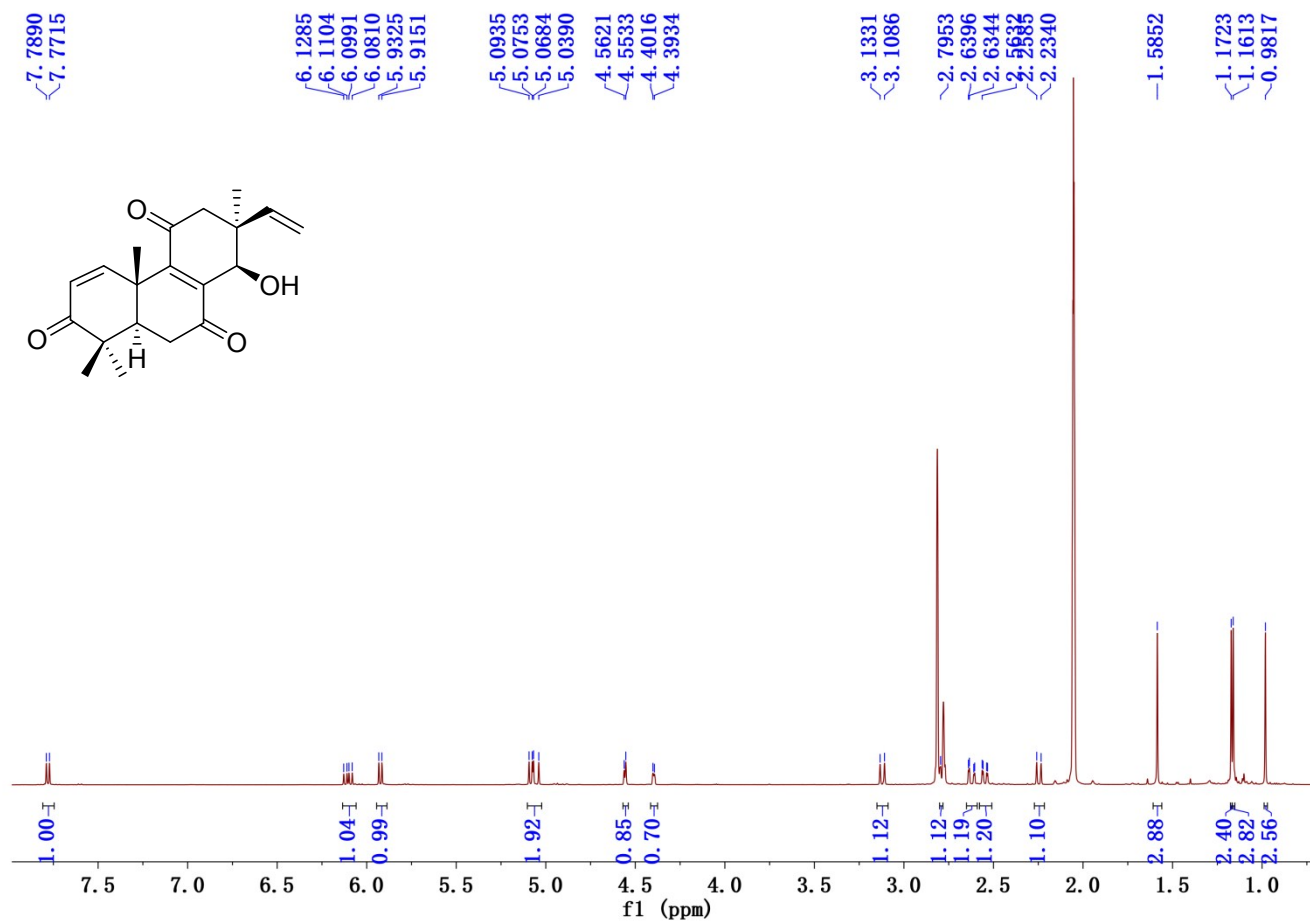

**Figure S2.**  $^{13}\text{C}$  NMR Spectrum of Sarcosenone A (**1**; 150 MHz, Acetone- $d_6$ )

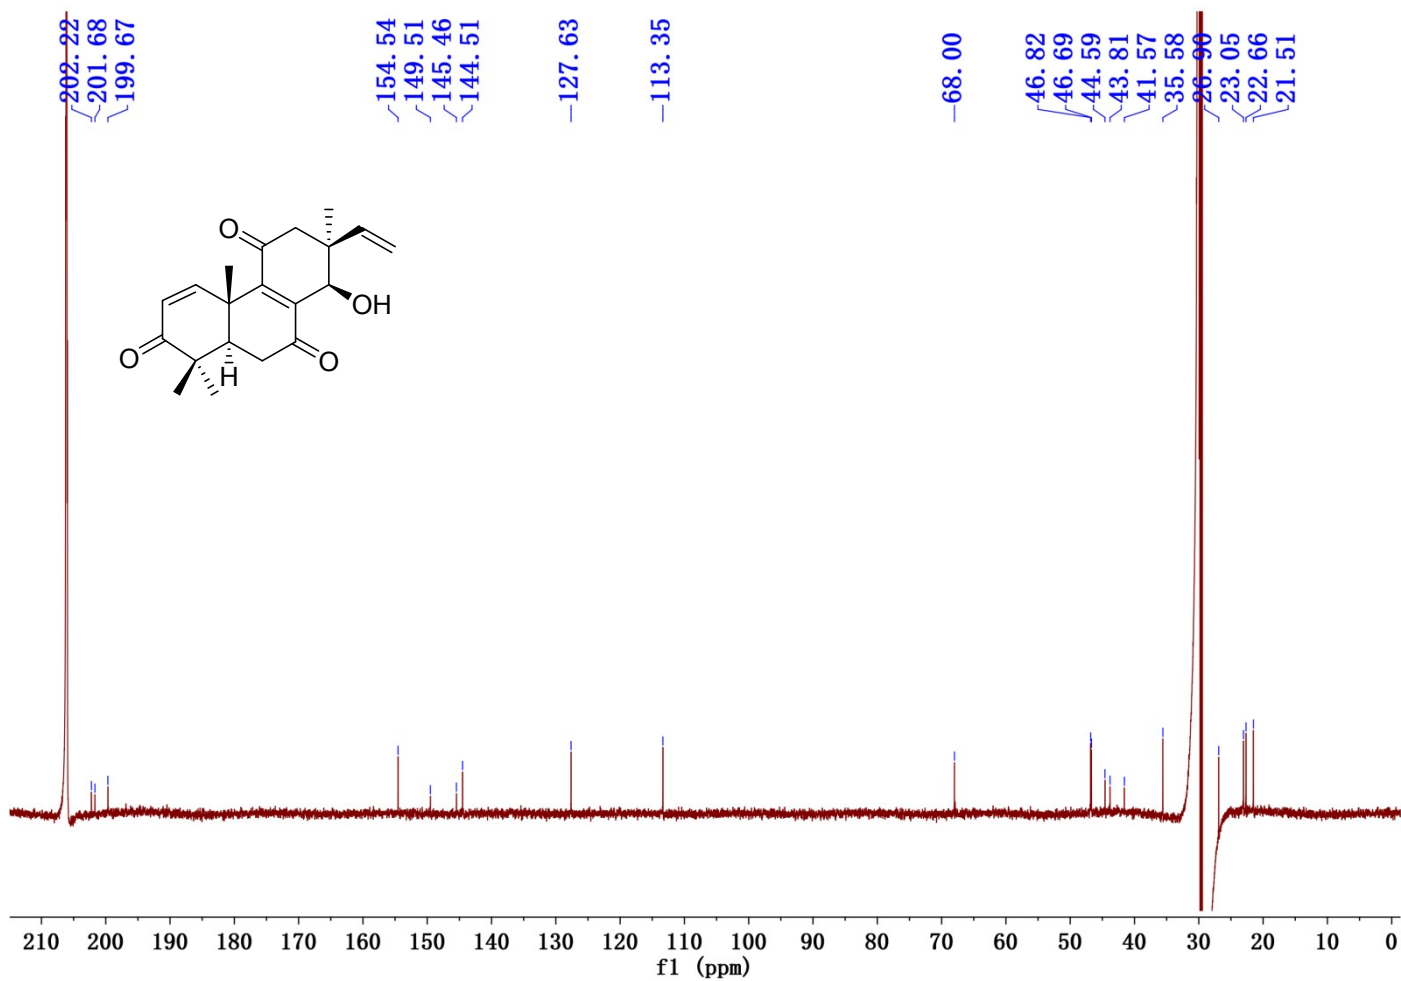

**Figure S3.** HSQC Spectrum of Sarcosenone A (1; 600 MHz, Acetone- $d_6$ )

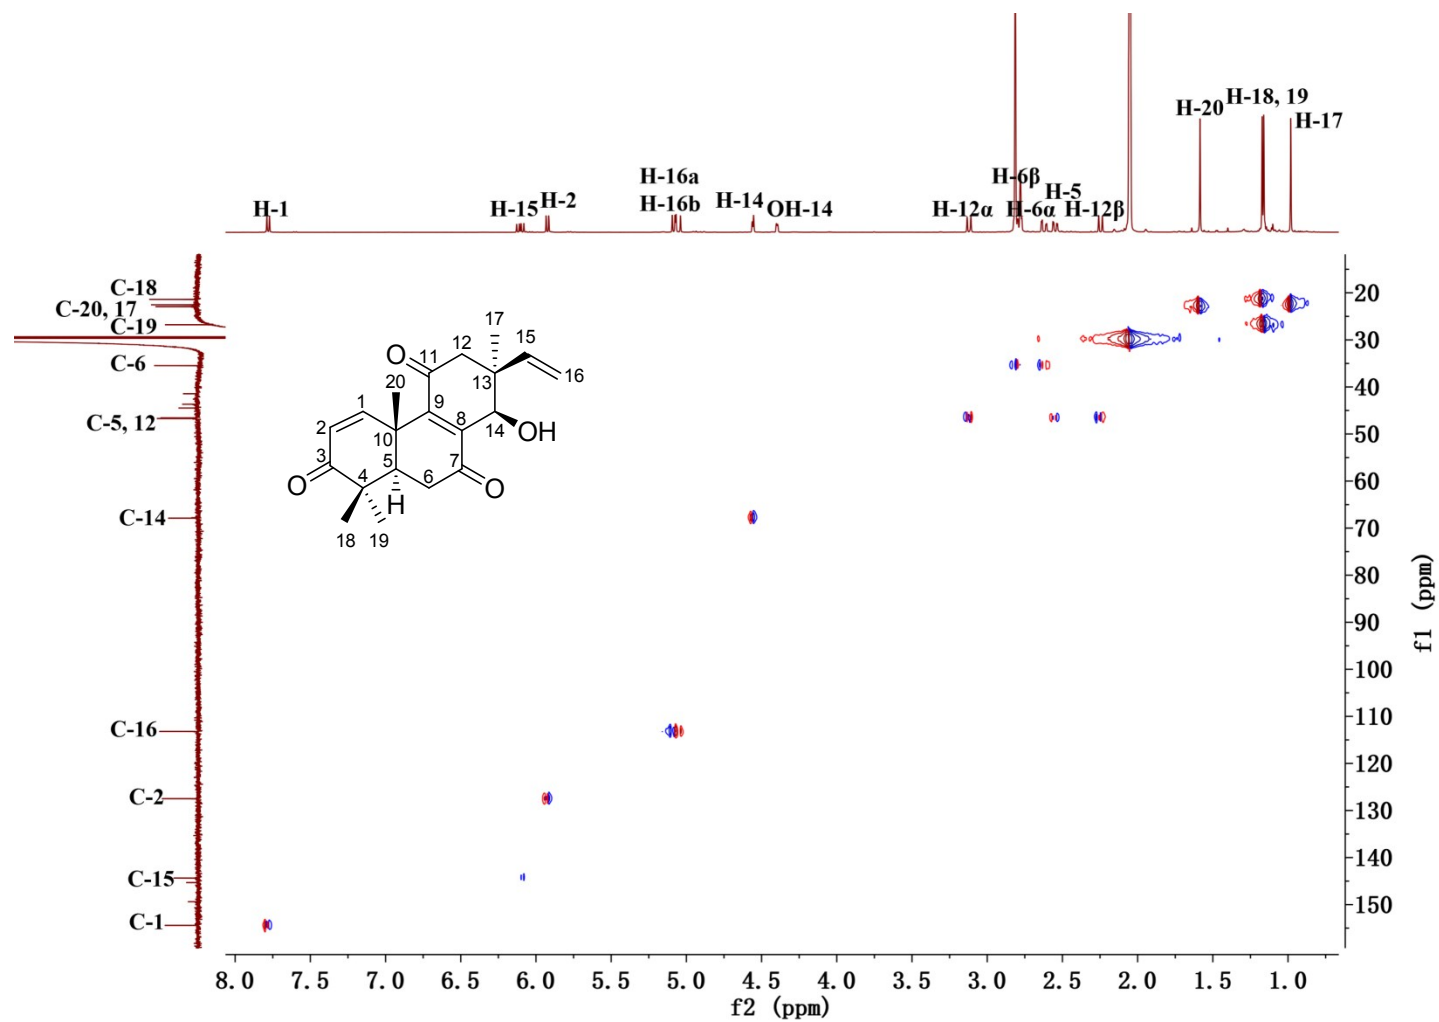

**Figure S4.**  $^1\text{H}$ - $^1\text{H}$  COSY Spectrum of Sarcosenone A (**1**; 600 MHz, Acetone- $d_6$ )

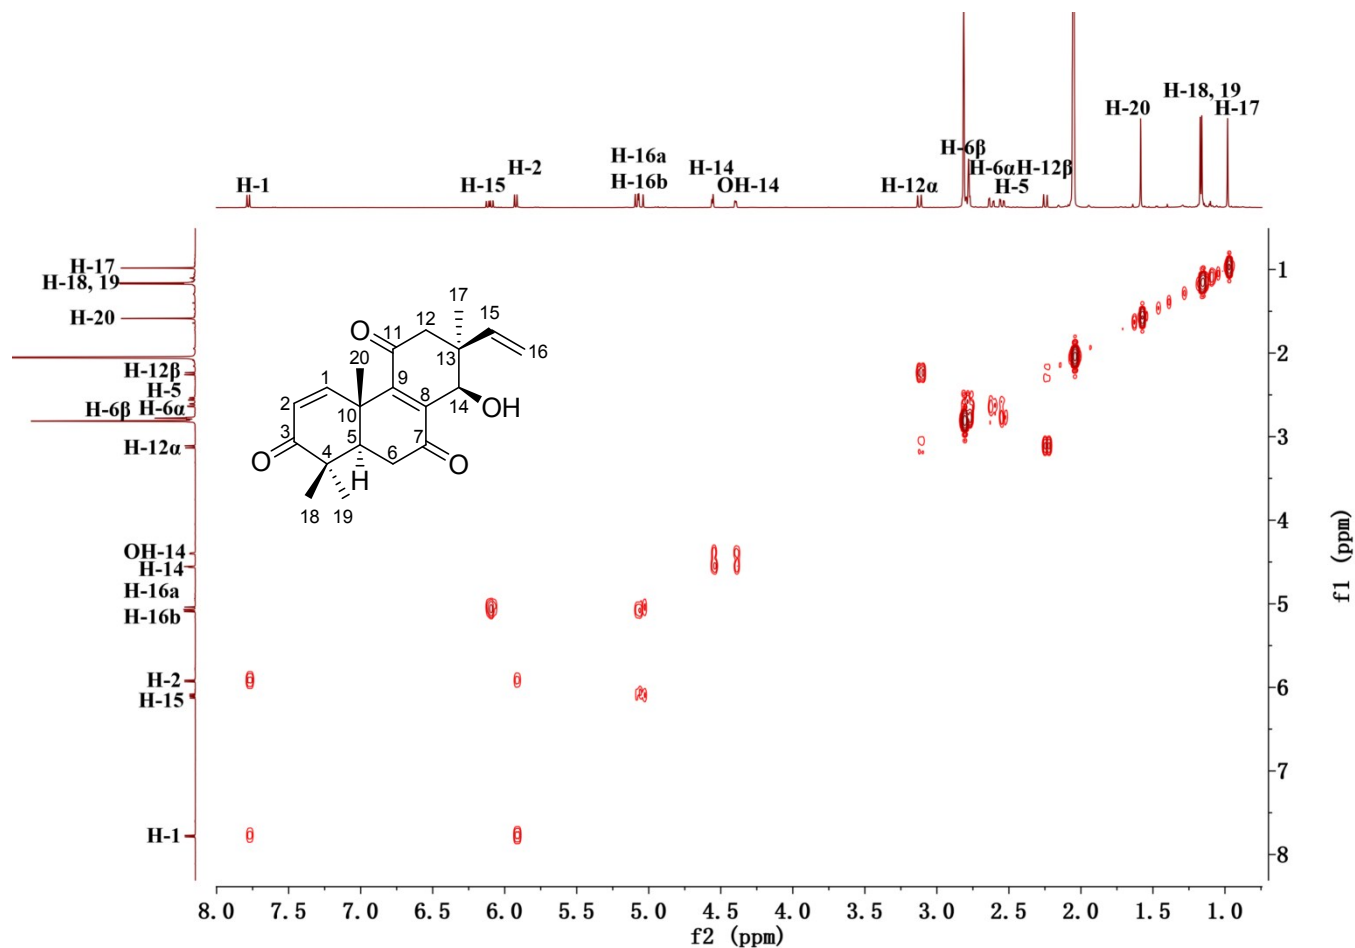

**Figure S5.** HMBC Spectrum of Sarcosenone A (**1**; 600 MHz, Acetone- $d_6$ )

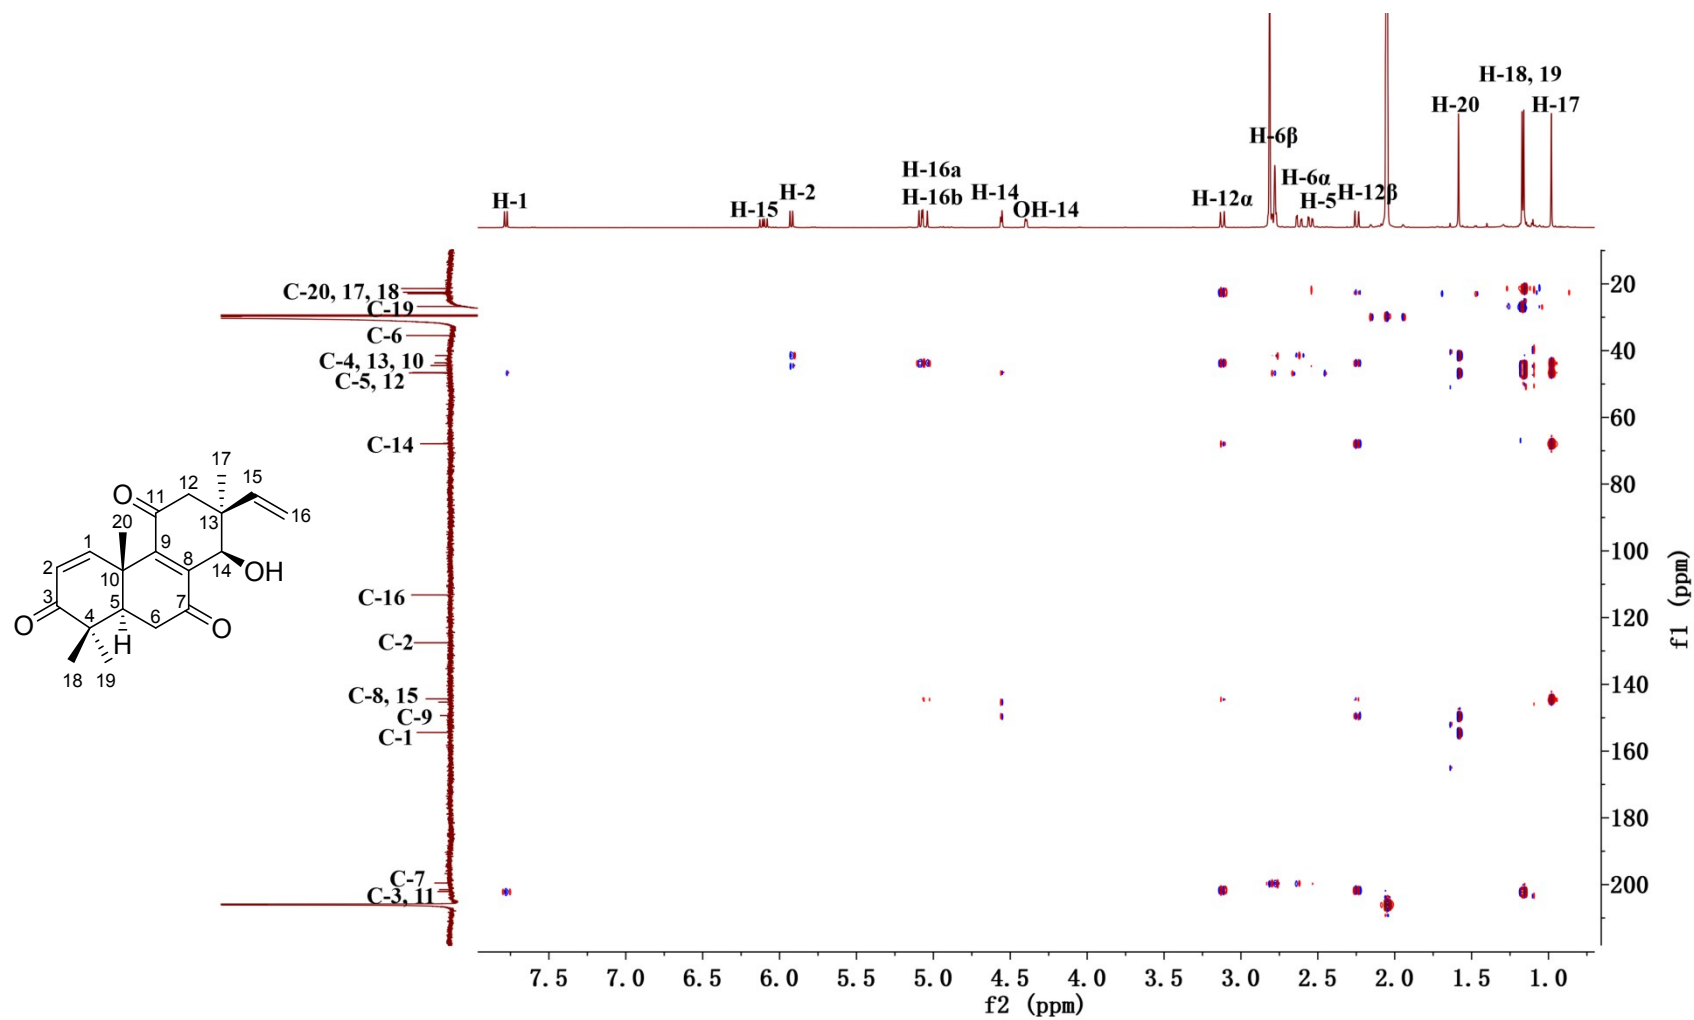



**Figure S6.** NOESY Spectrum of Sarcosenone A (**1**; 600 MHz, Acetone-*d*<sub>6</sub>)

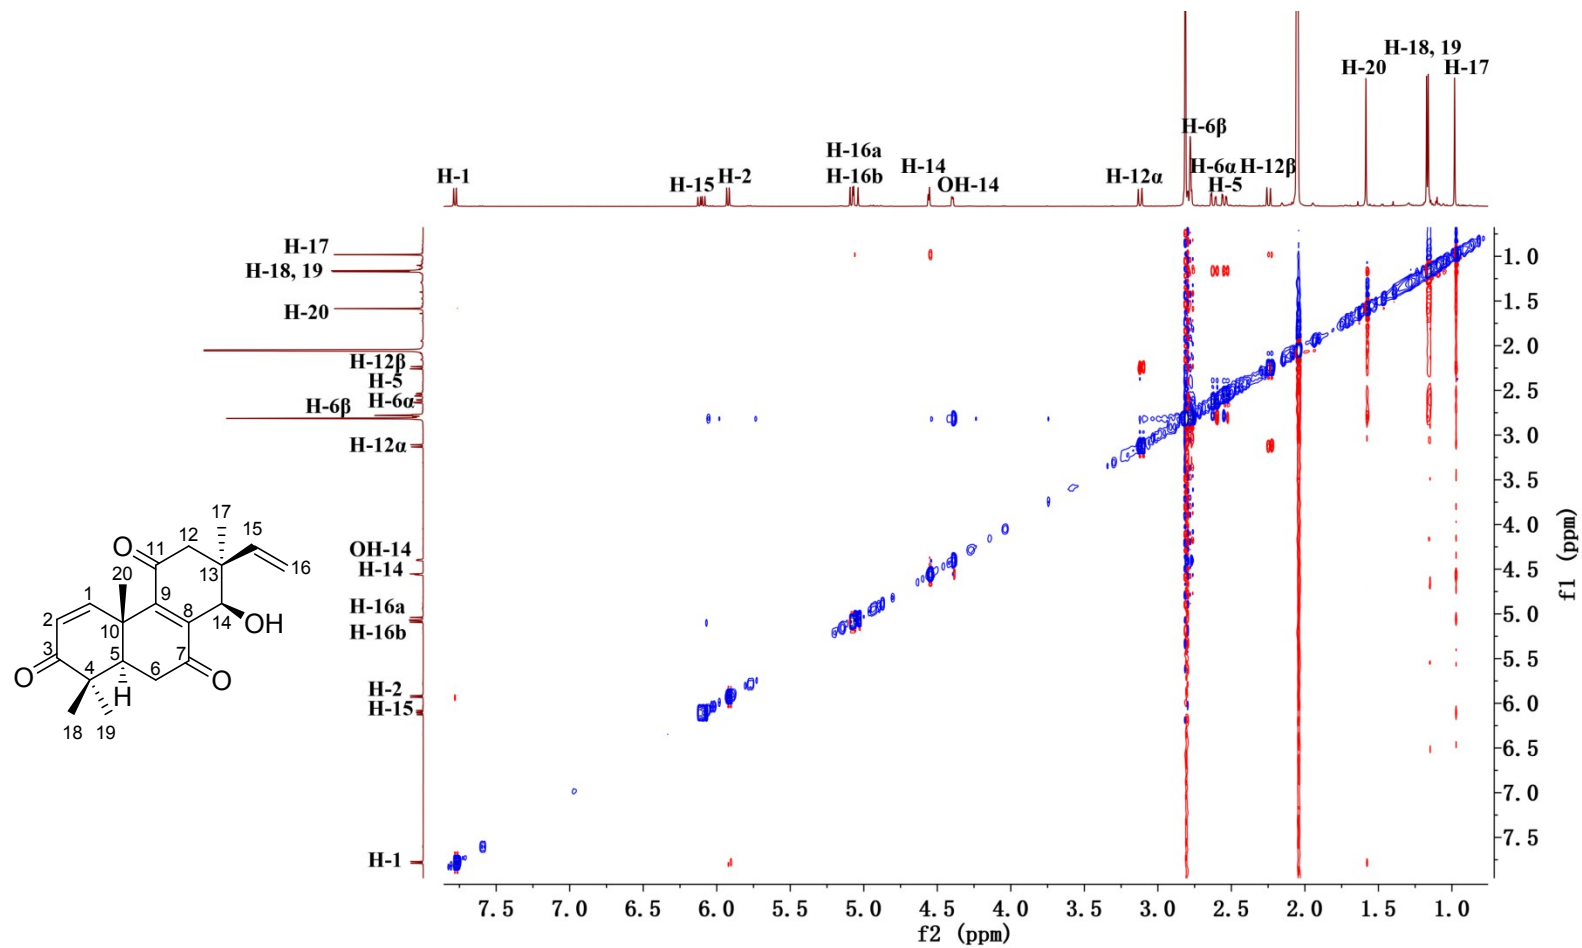

**Figure S7.** HRESIMS Spectrum of Sarcosenone A (1)

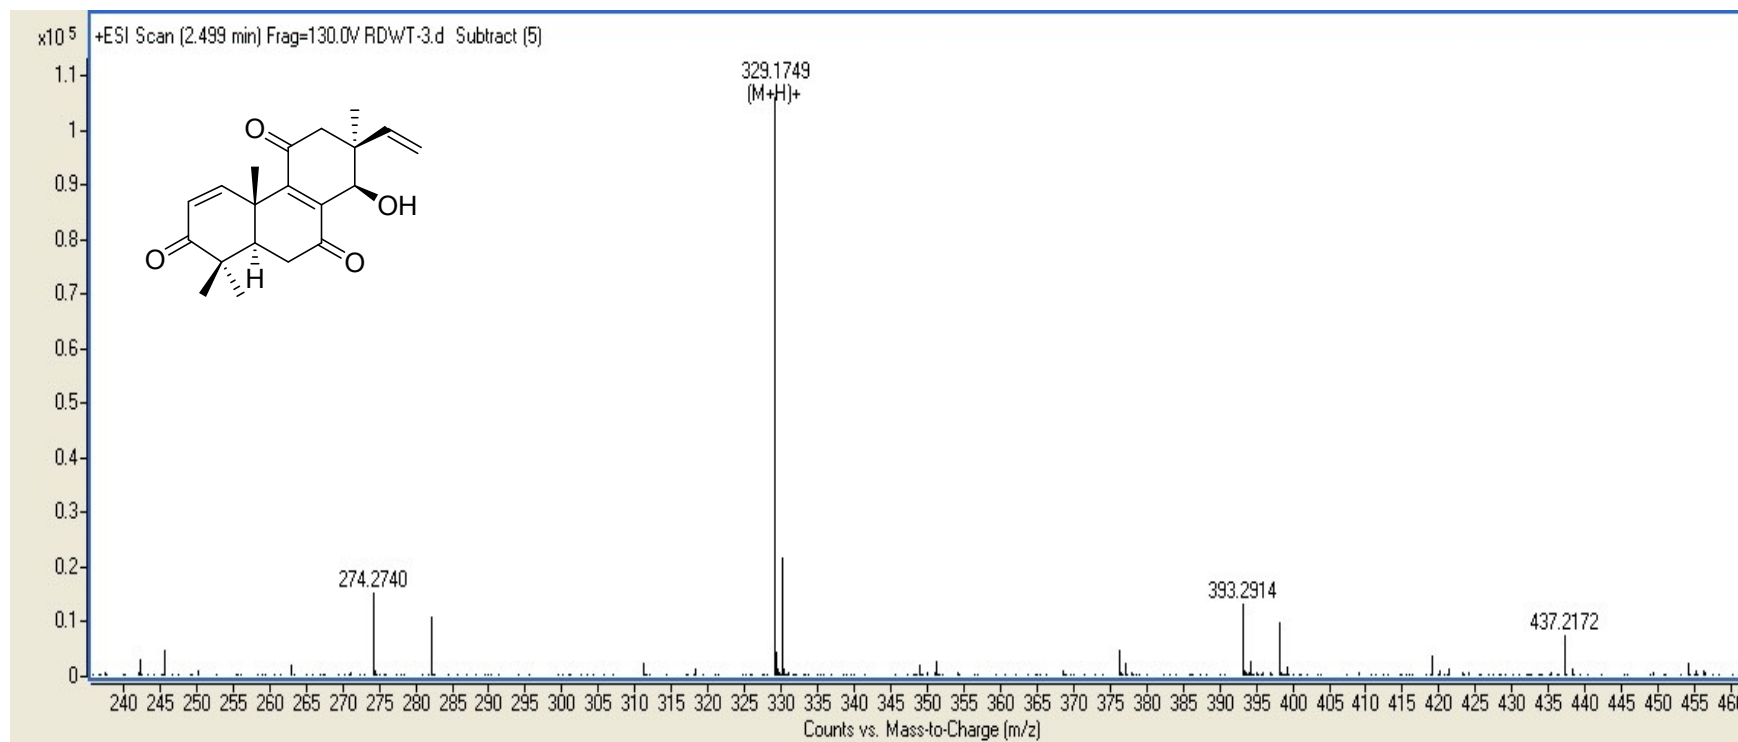

**Figure S8.** IR Spectrum of Sarcosenone A (1)

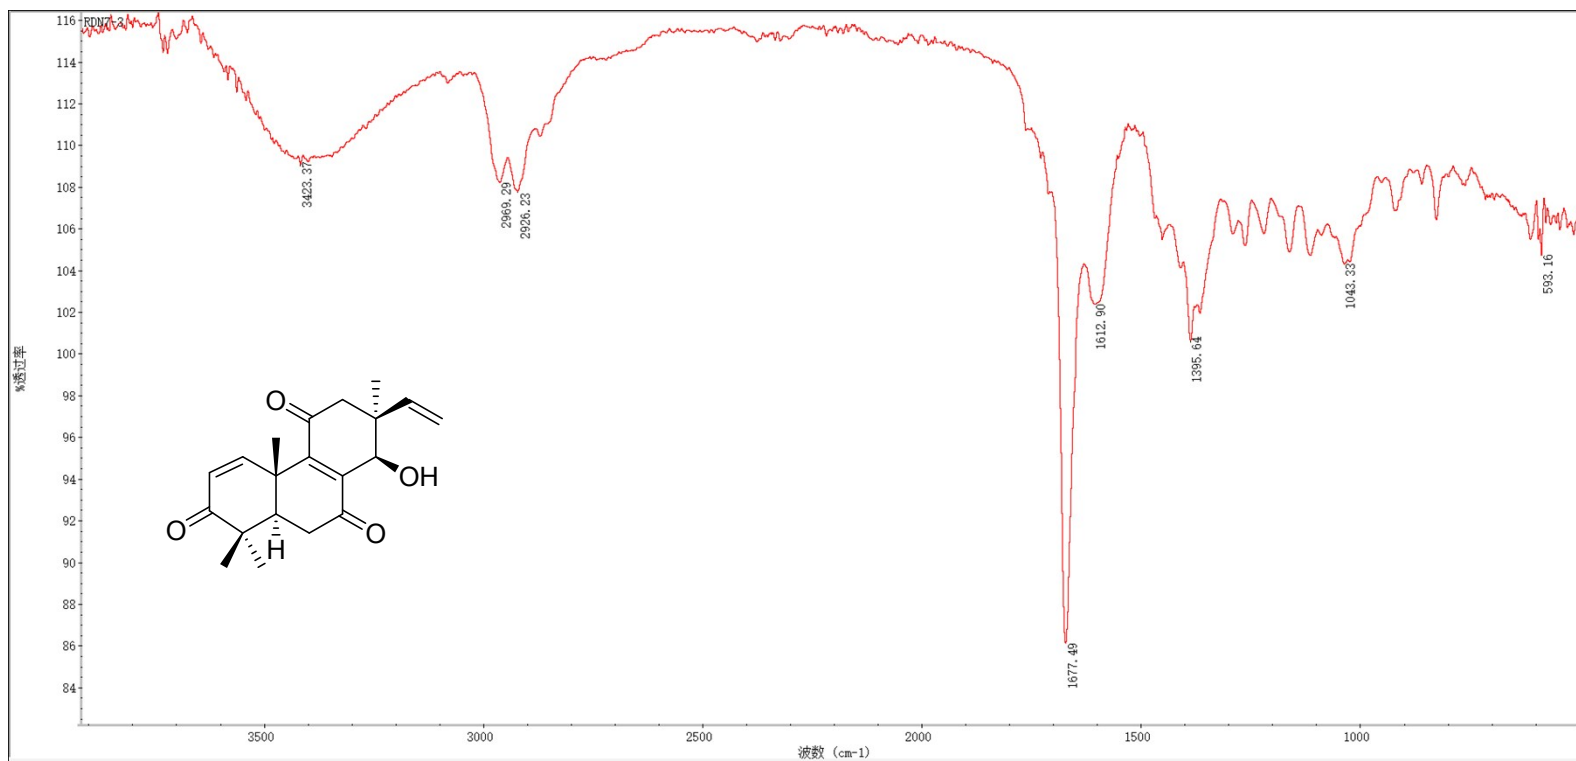

**Figure S9.** UV Spectrum of Sarcosenone A (1) in MeOH

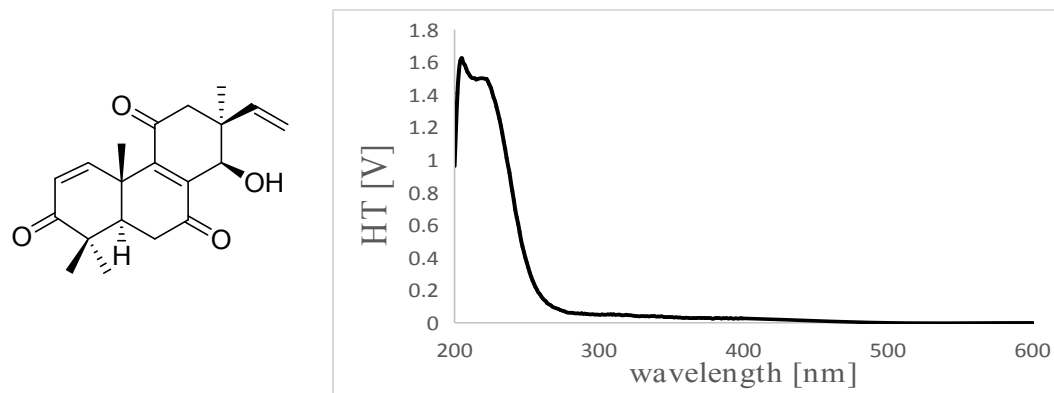

**Figure S10.** CD Spectrum of Sarcosenone A (1) in MeOH

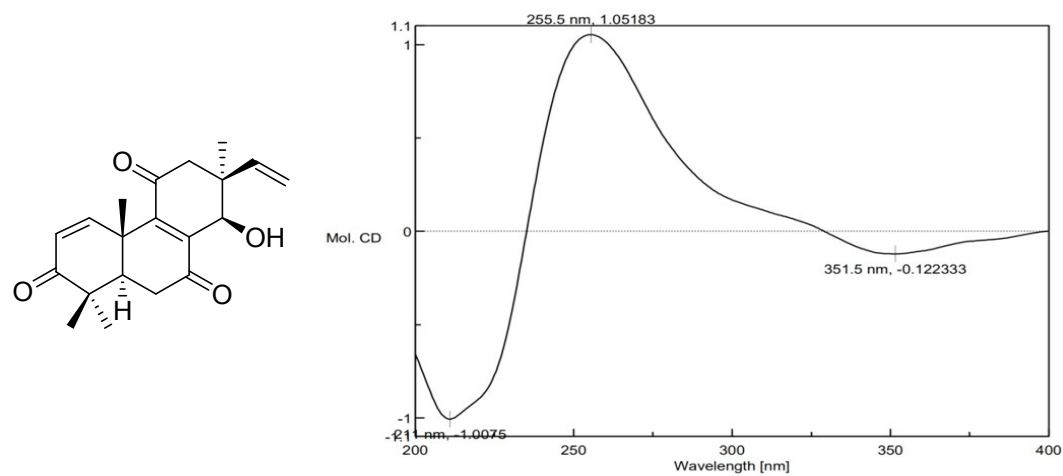

**Figure S11.** Relative Configurations and the Optimized Conformers for **1**

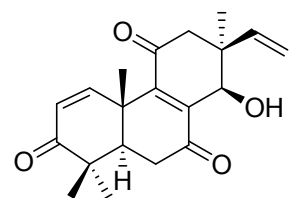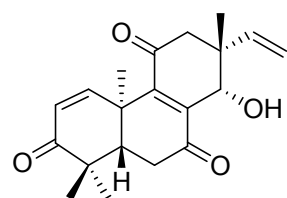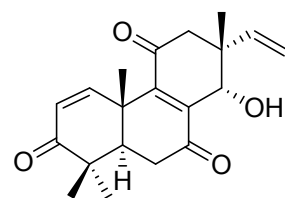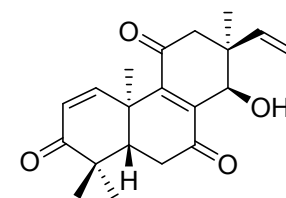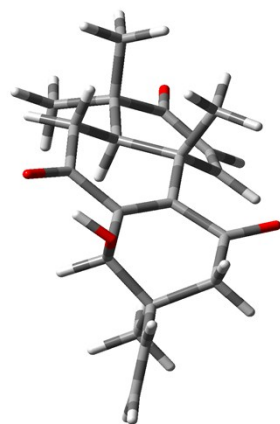

**1a**

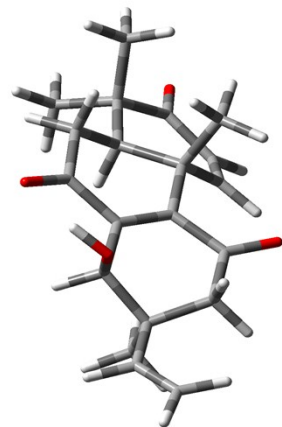

**1b**

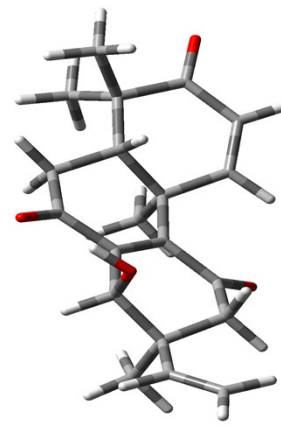

**1c**

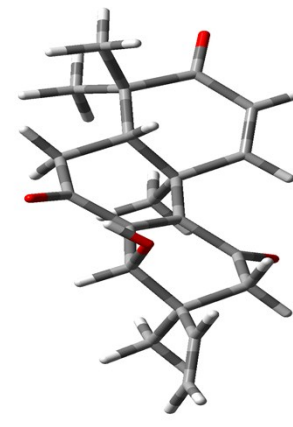

**1d**

**Figure S12.**  $^1\text{H}$  NMR Spectrum of Sarcosenone B (**2**; 600 MHz, Acetone- $d_6$ )

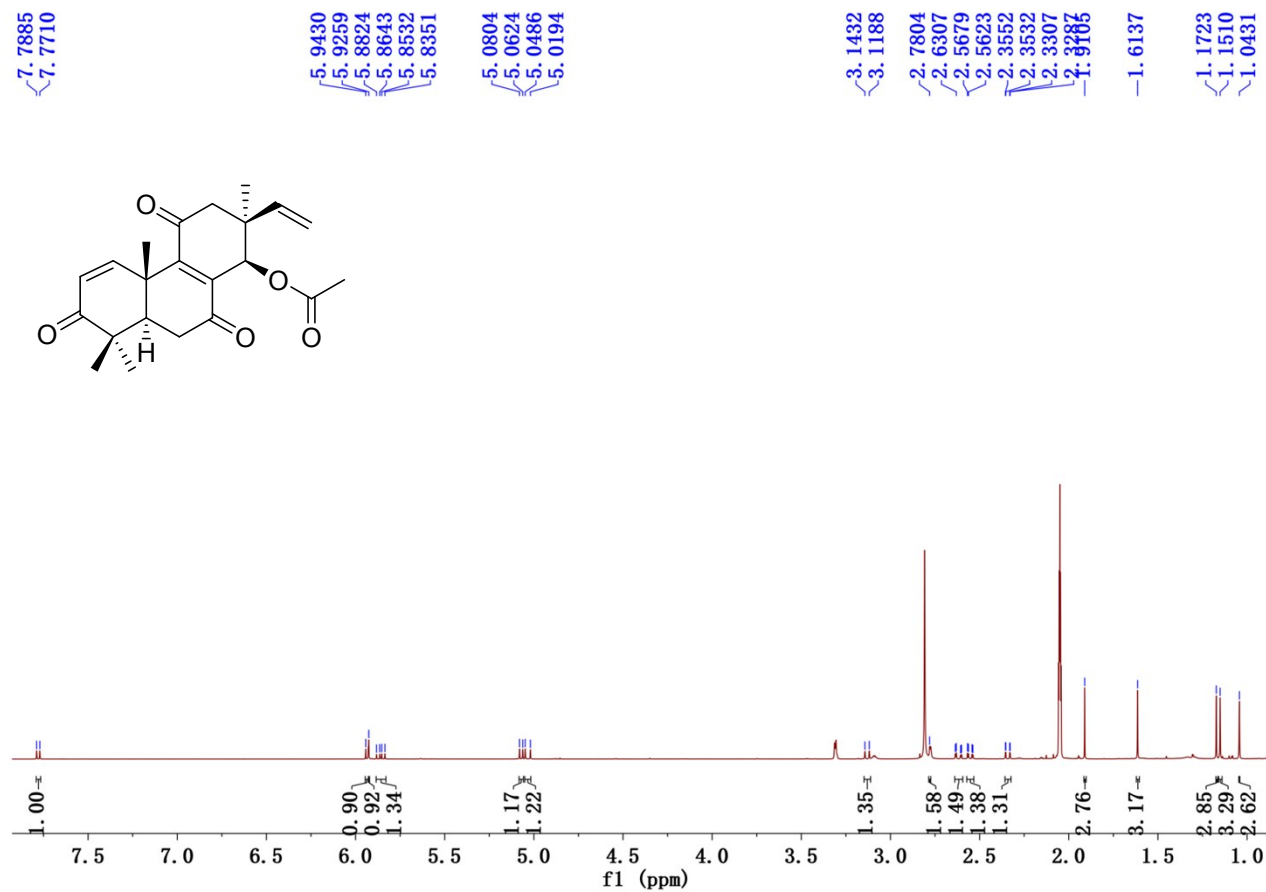

**Figure S13.**  $^{13}\text{C}$  NMR Spectrum of Sarcosenone B (**2**; 150 MHz, Acetone- $d_6$ )

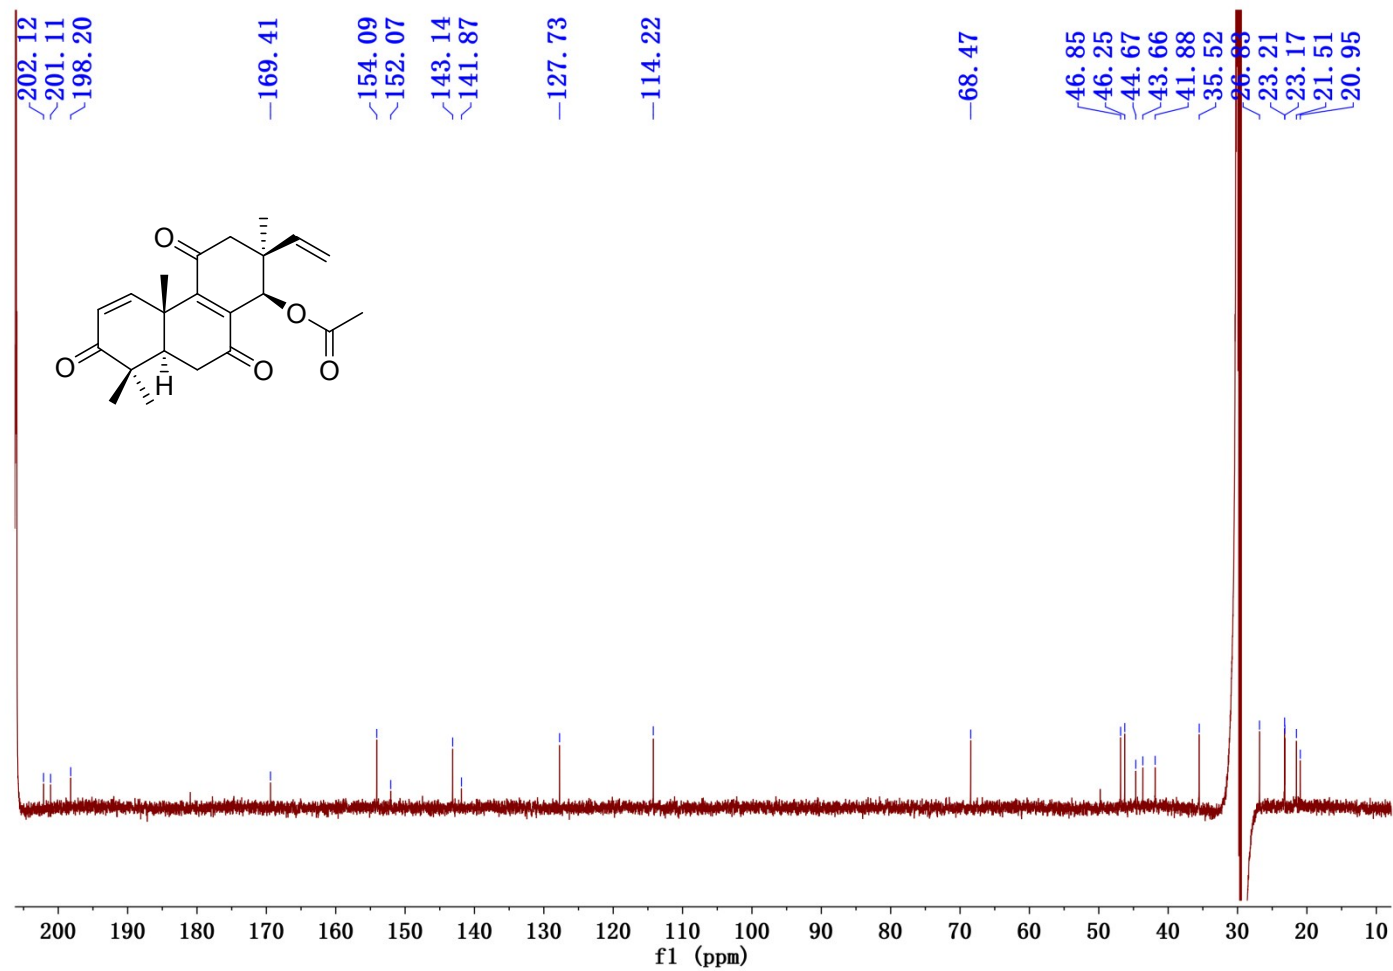

**Figure S14.** HSQC Spectrum of Sarcosenone B (**2**; 600 MHz, Acetone- $d_6$ )

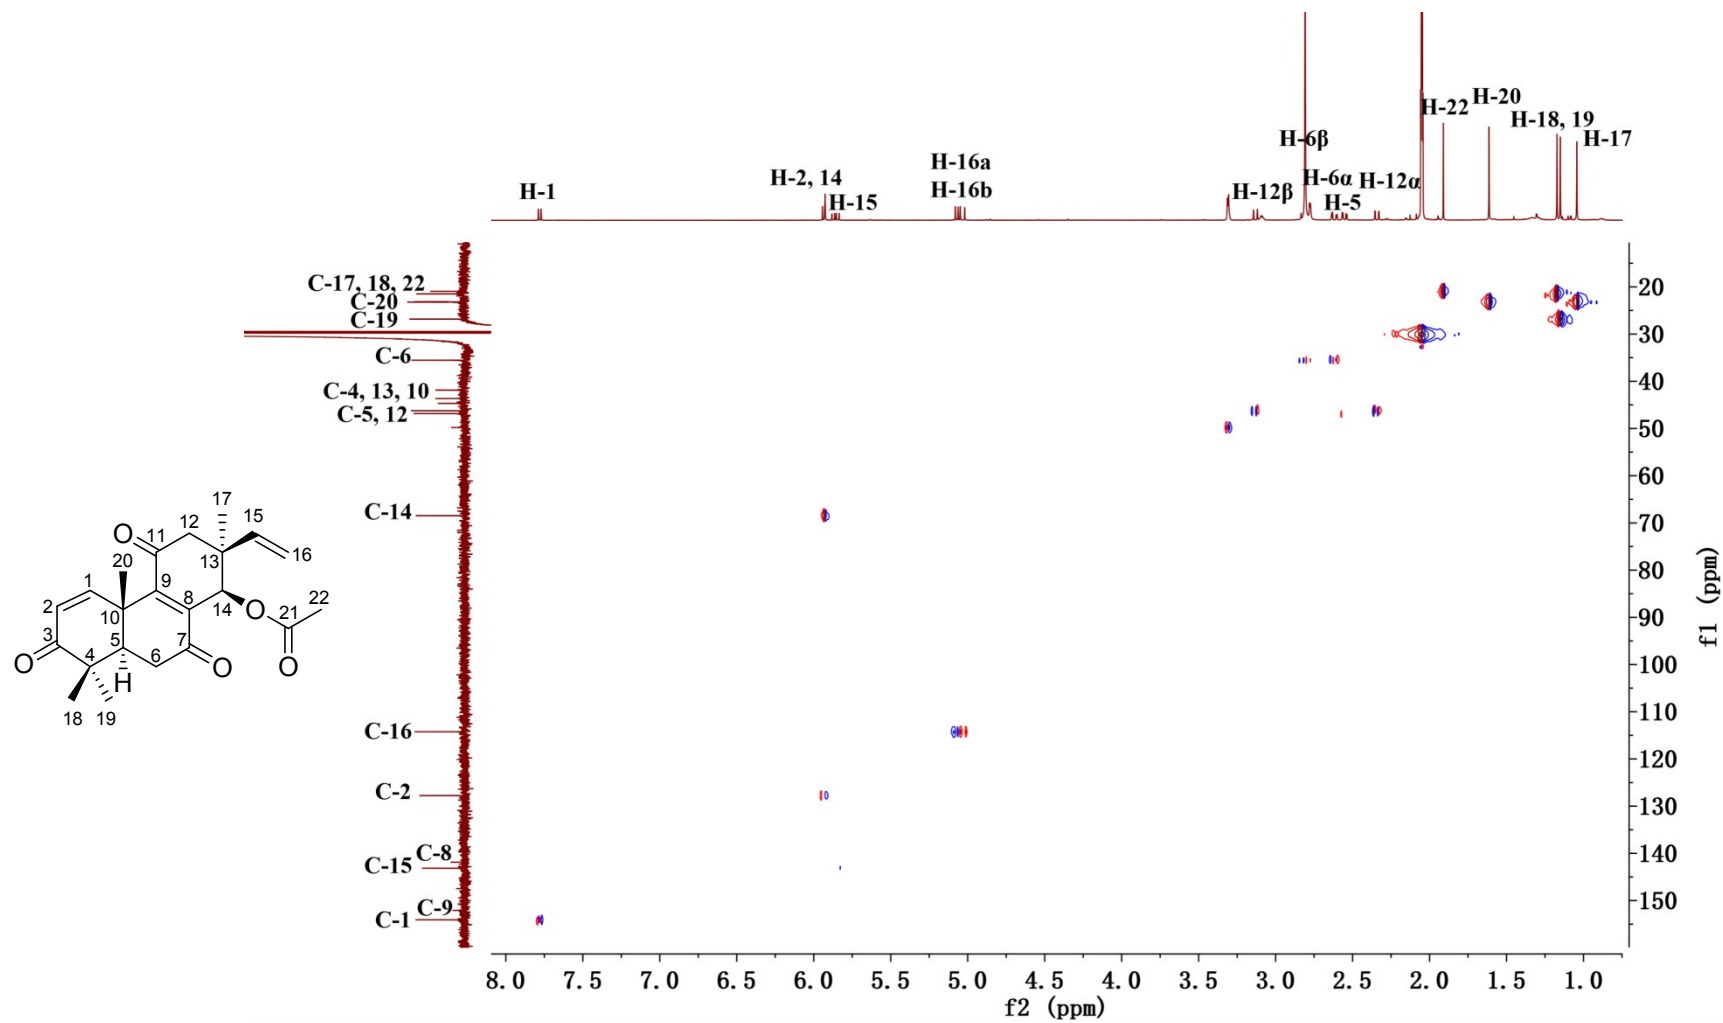



**Figure S15.**  $^1\text{H}$ - $^1\text{H}$  COSY Spectrum of Sarcosenone B (**2**; 600 MHz, Acetone- $d_6$ )

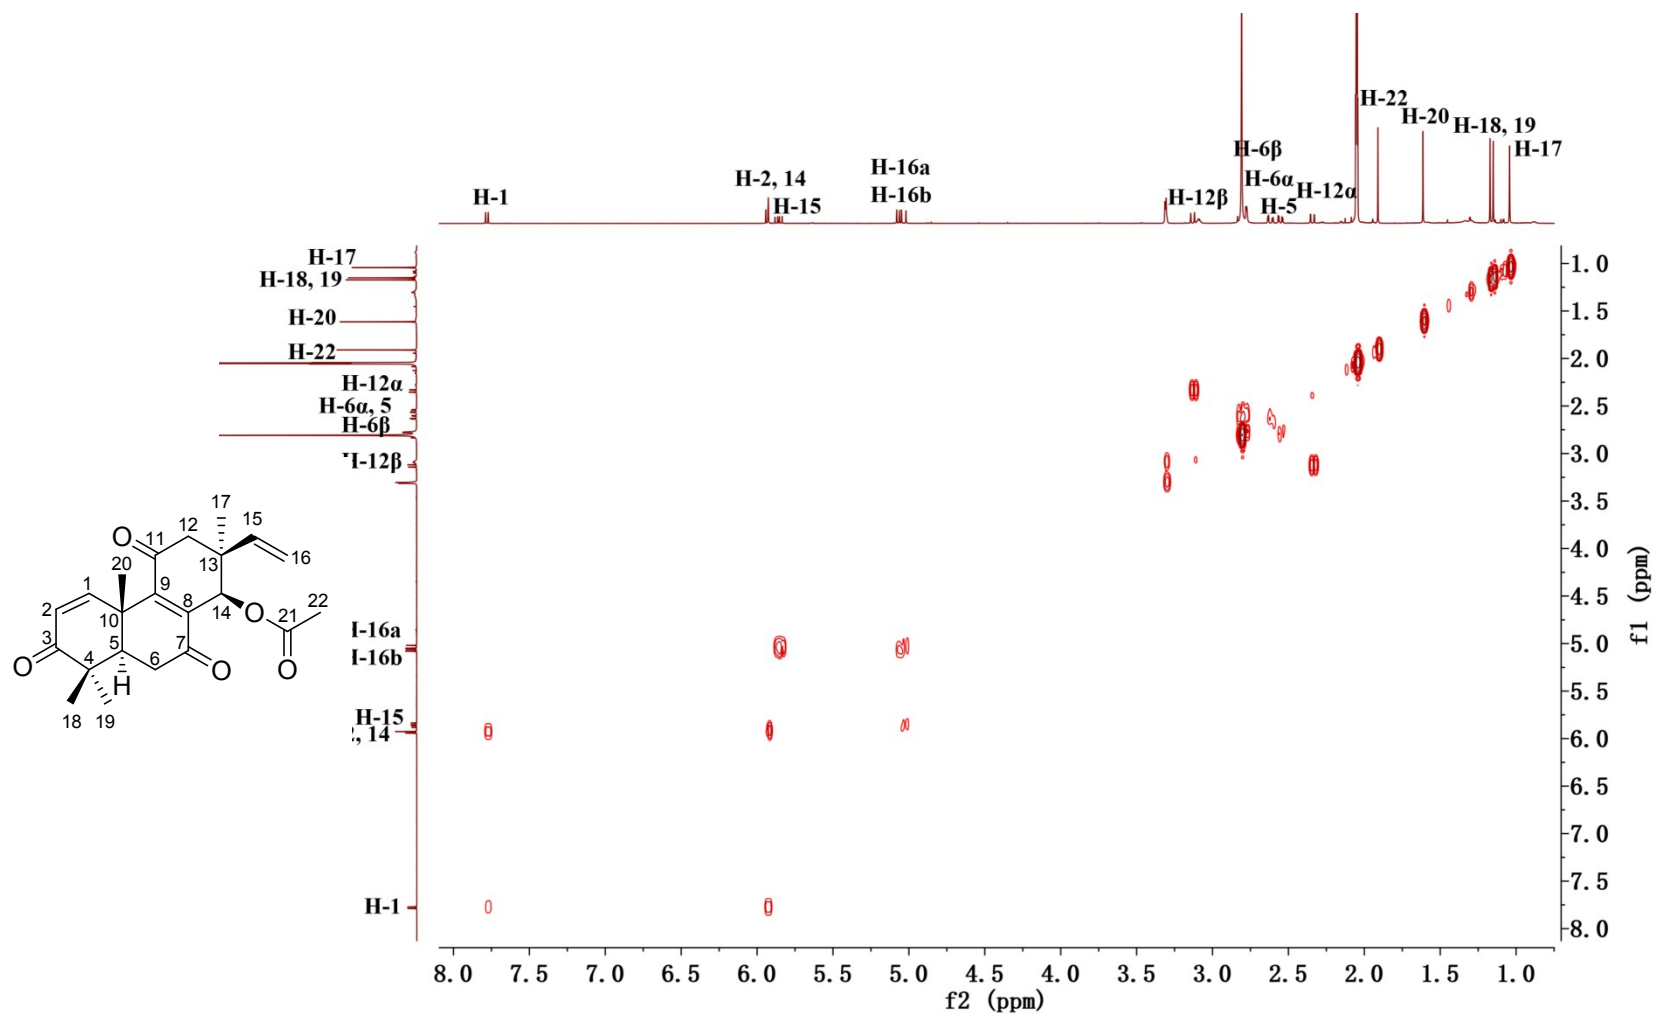

**Figure S16.** HMBC Spectrum of Sarcosenone B (**2**; 600 MHz, Acetone-*d*<sub>6</sub>)

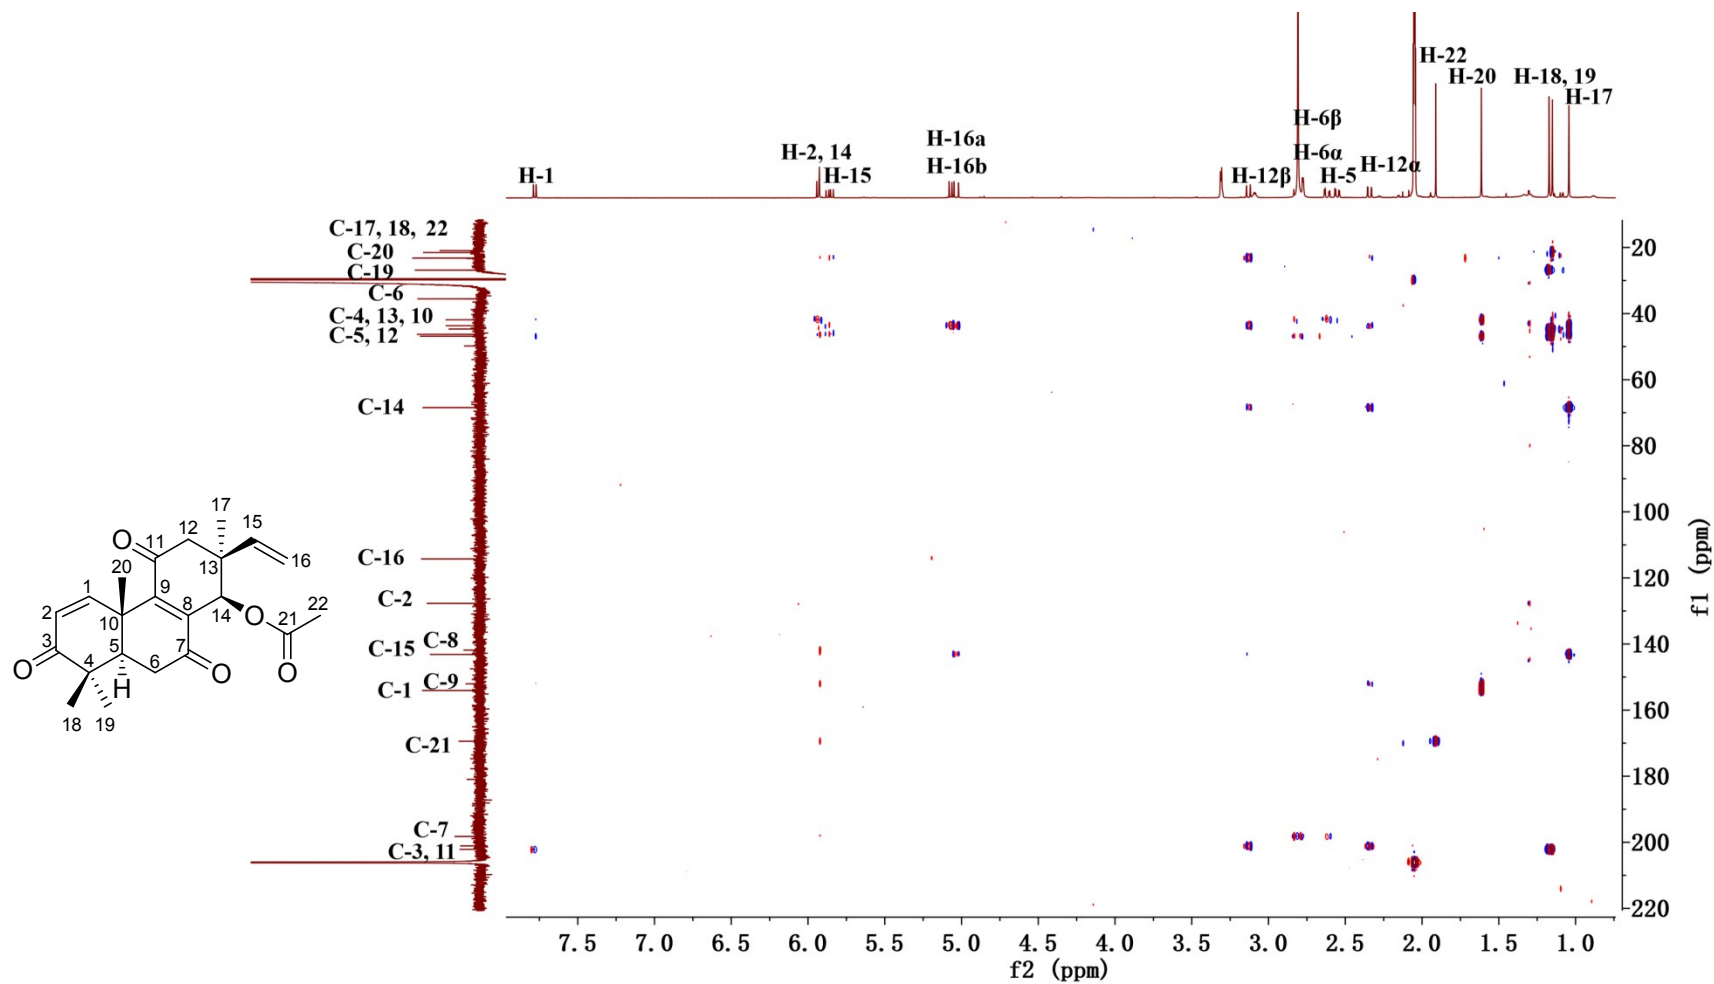

**Figure S17.** NOESY Spectrum of Sarcosenone B (**2**; 600 MHz, Acetone- $d_6$ )

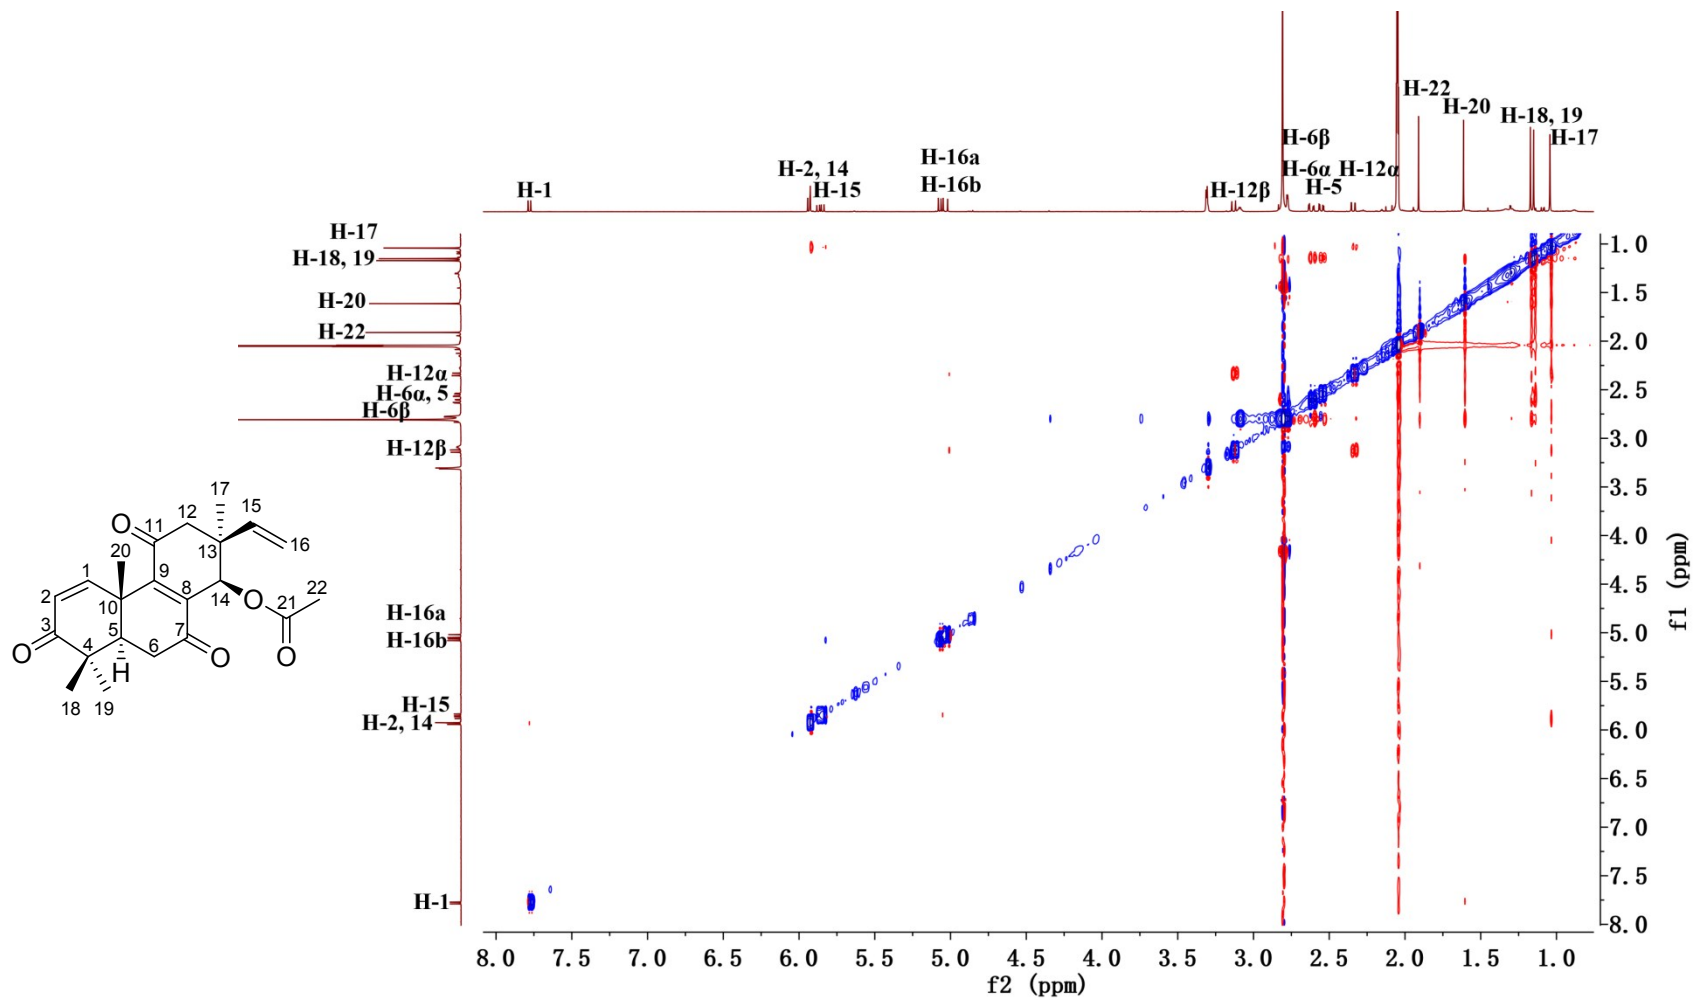

**Figure S18.** HRESIMS Spectrum of Sarcosenone B (2)

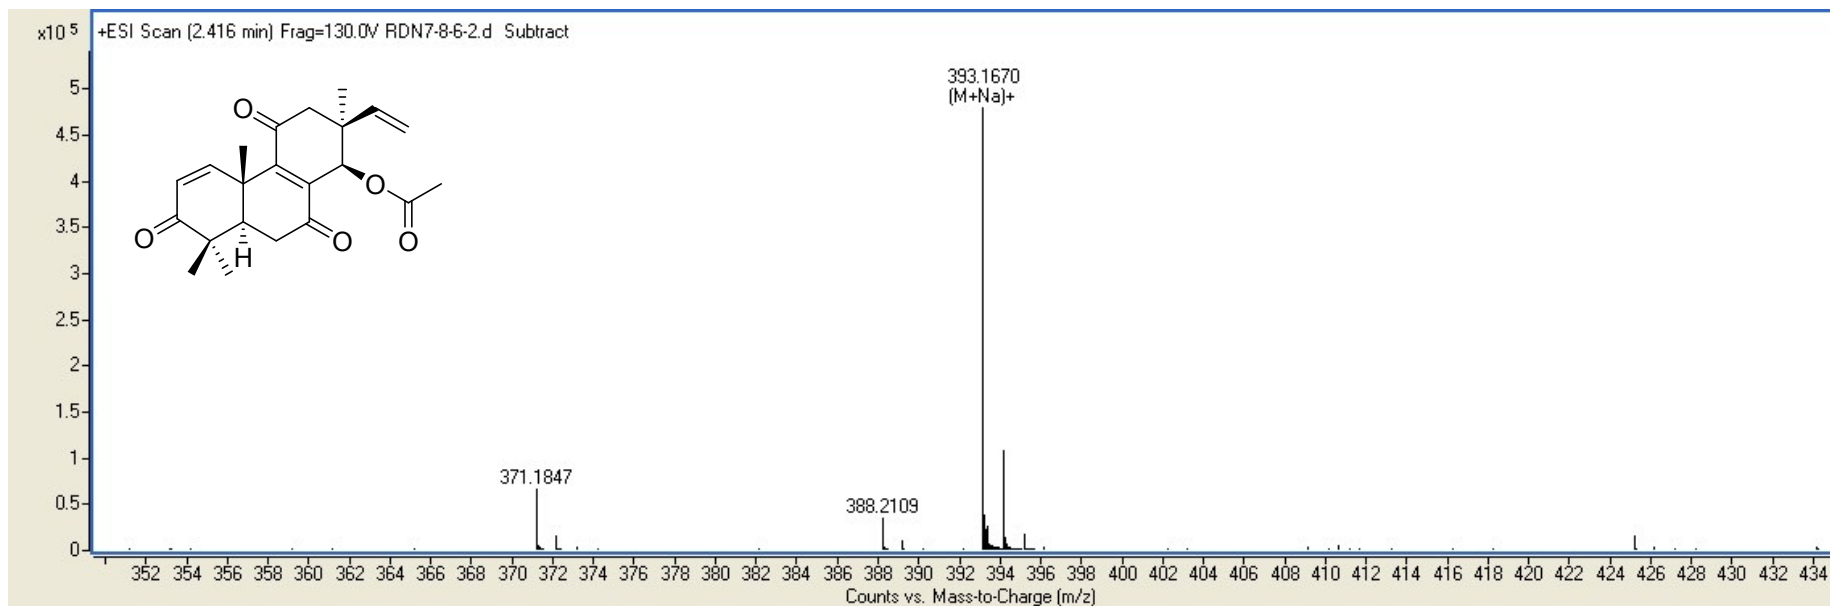

**Figure S19.** IR Spectrum of Sarcosenone B (2)

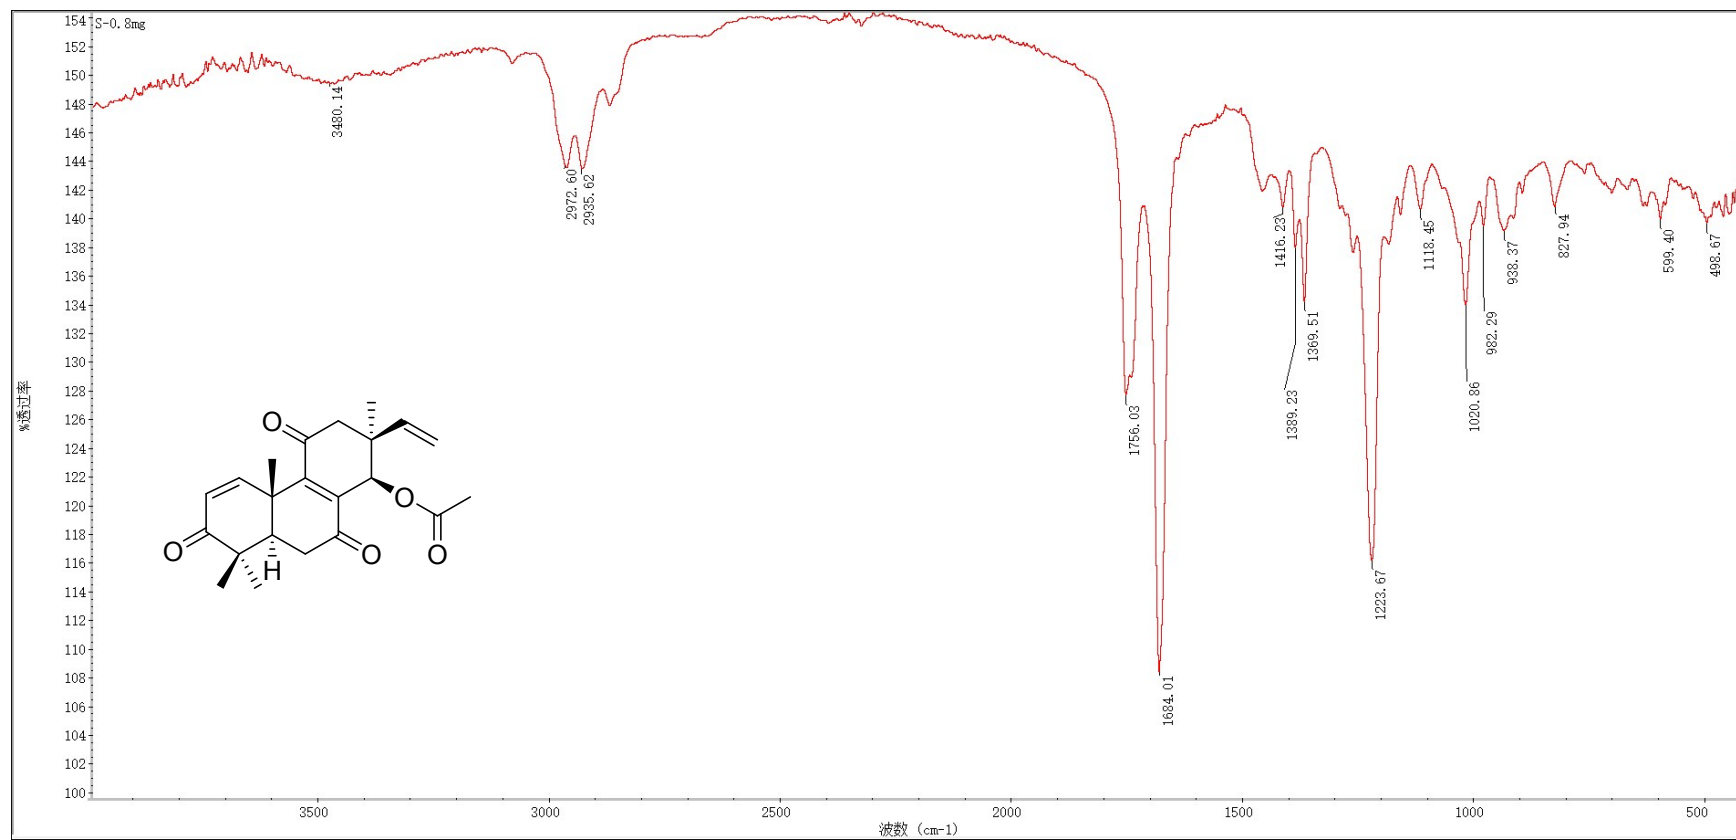

**Figure S20.** UV Spectrum of Sarcosenone B (2) in MeOH

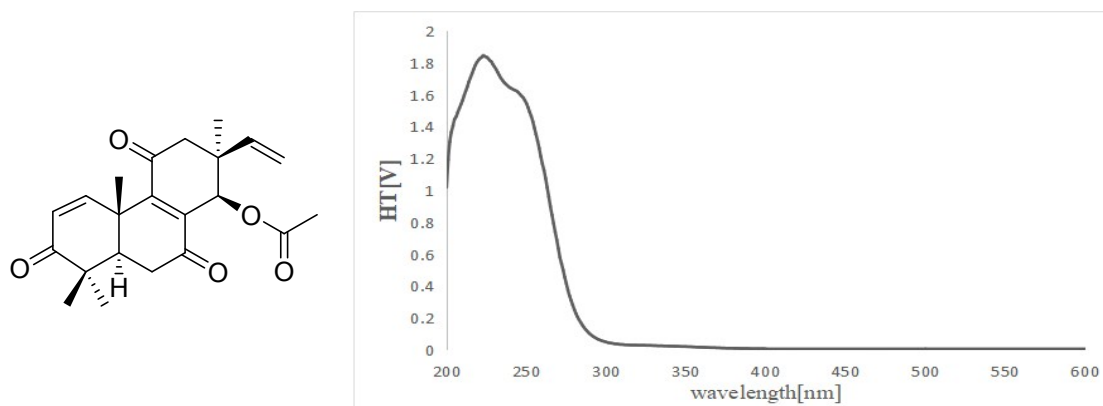

**Figure S21.** CD Spectrum of Sarcosenone B (2) in MeOH

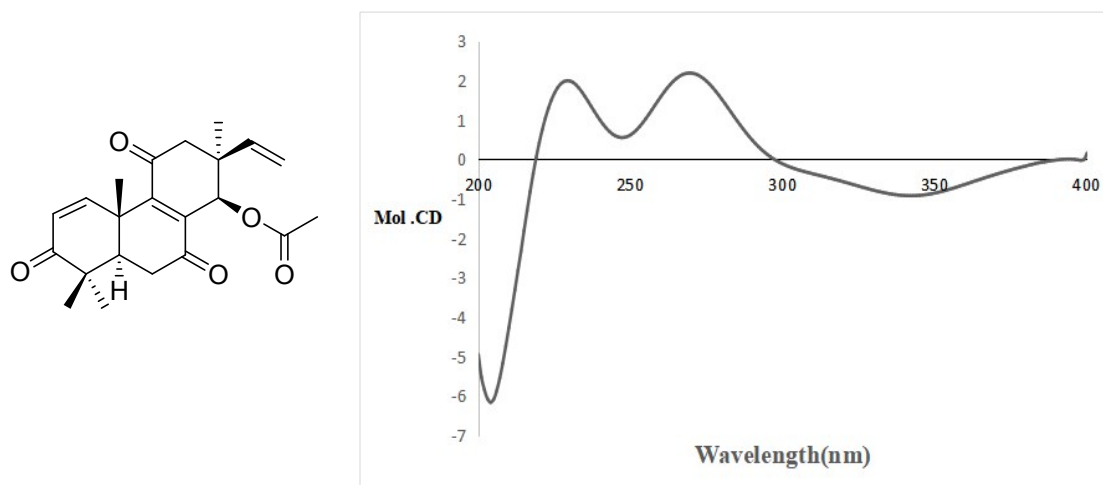

**Figure S22.** Relative Configurations and the Optimized Conformers for **2**

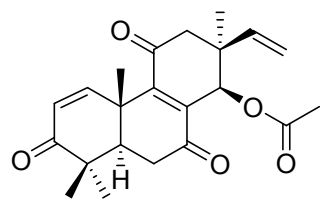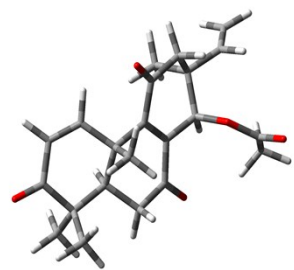

**2a**

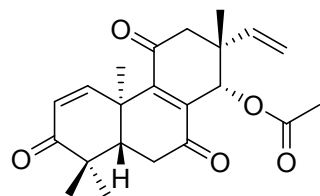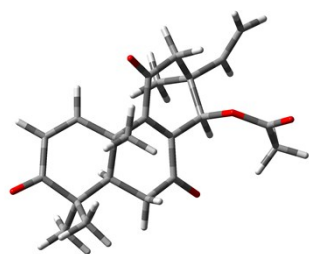

**2b**

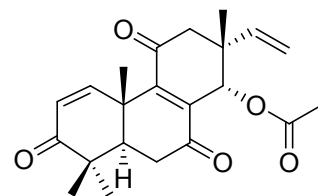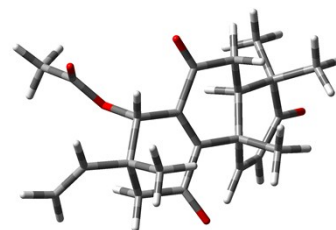

**2c**

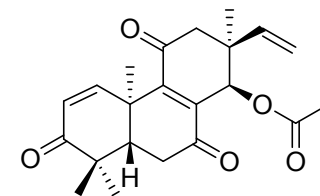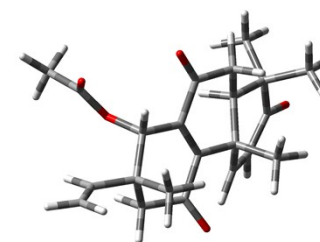

**2d**

**Figure S23.**  $^1\text{H}$  NMR Spectrum of Sarcosenone C (**3**; 600 MHz,  $\text{CDCl}_3$ )

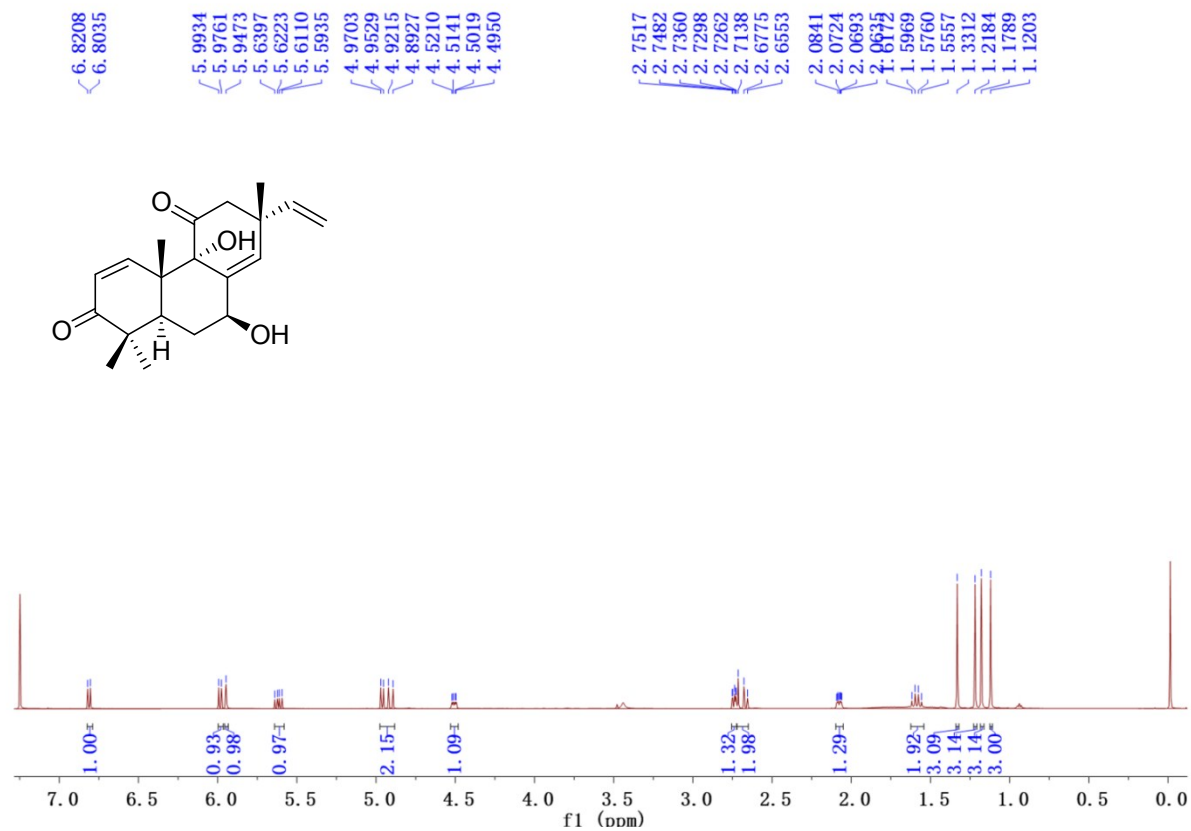



**Figure S24.**  $^{13}\text{C}$  NMR Spectrum of Sarcosenone C (**3**; 150 MHz,  $\text{CDCl}_3$ )

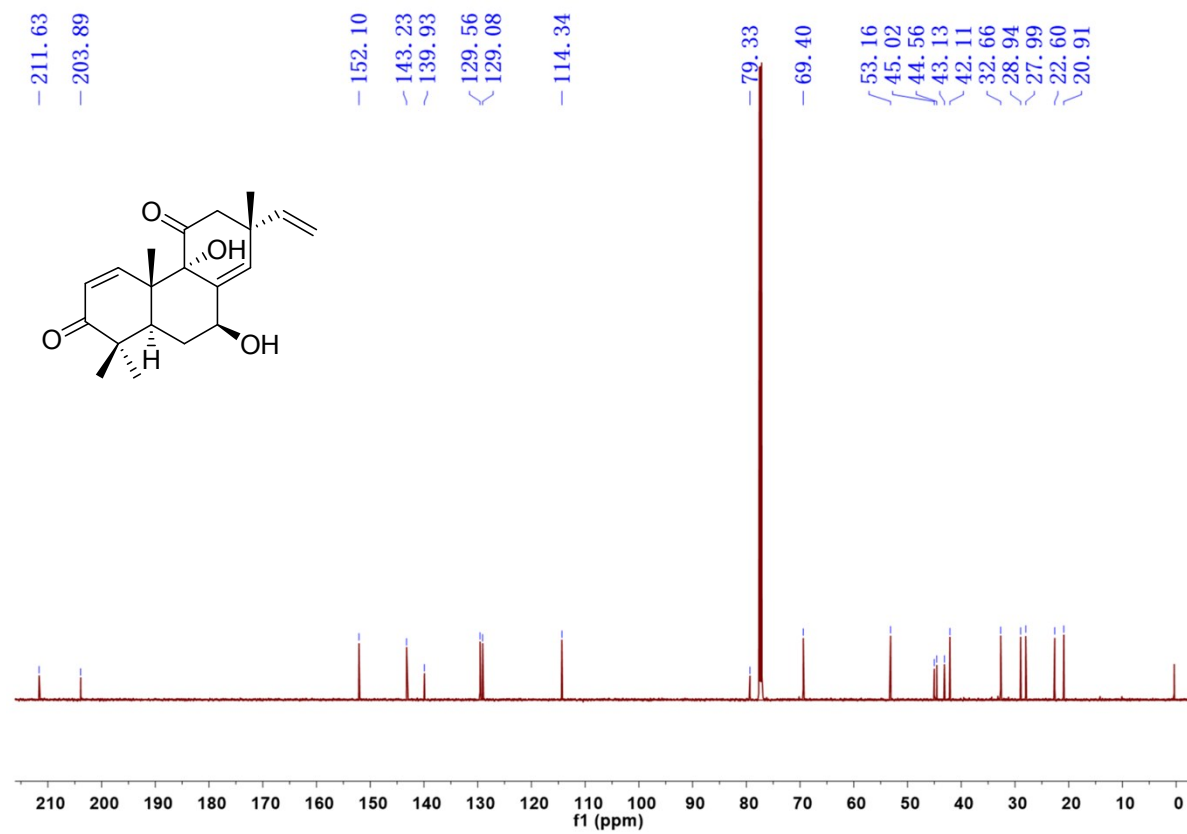

**Figure S25.** HSQC Spectrum of Sarcosenone C (**3**; 600 MHz, CDCl<sub>3</sub>)

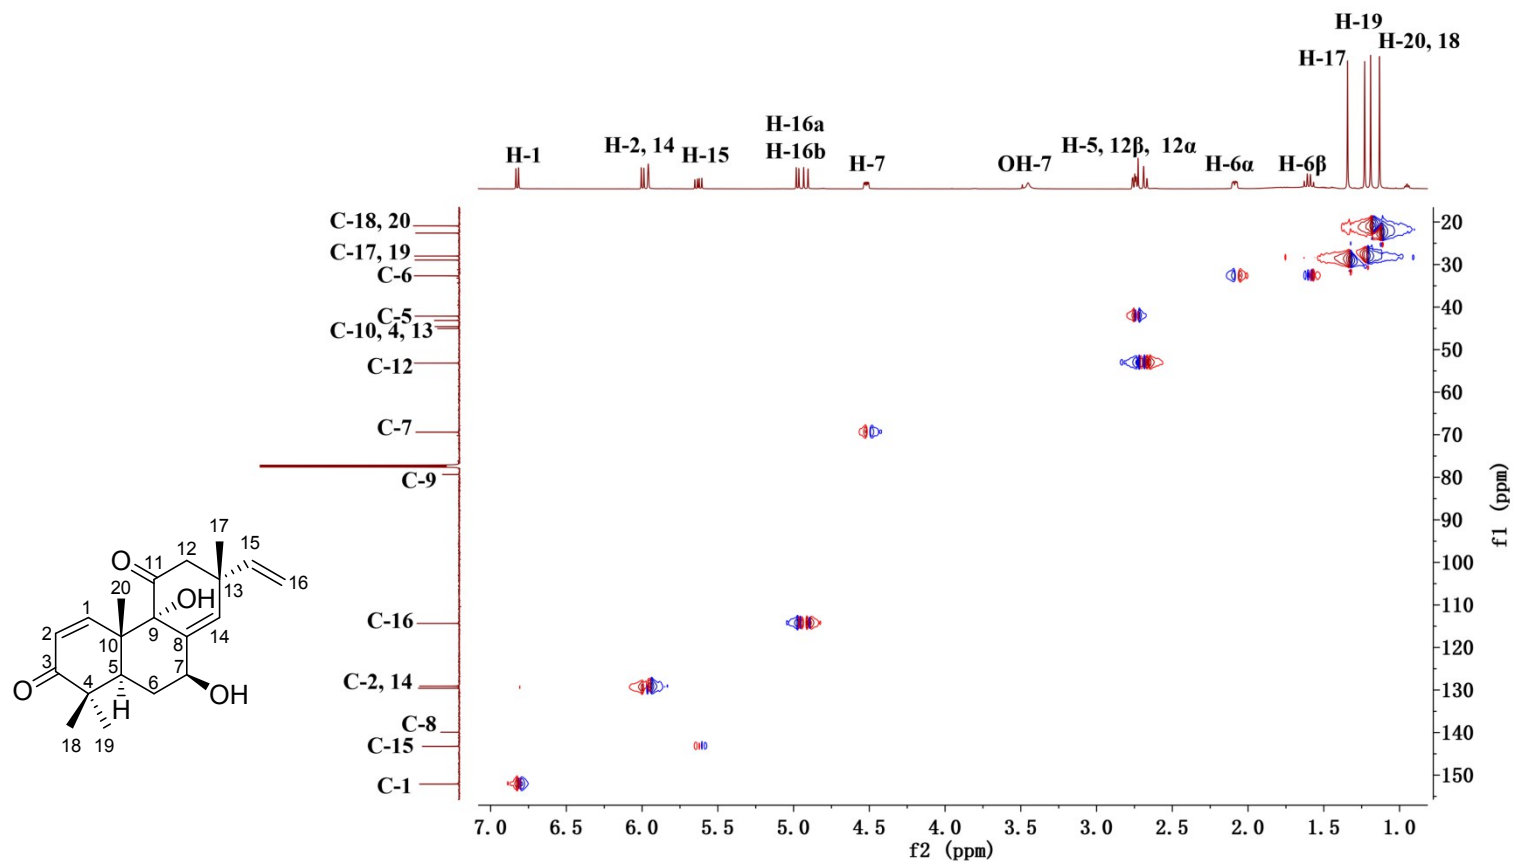

Figure S26.  $^1\text{H}$ - $^1\text{H}$  COSY Spectrum of Sarcosone C (**3**; 600 MHz,  $\text{CDCl}_3$ )

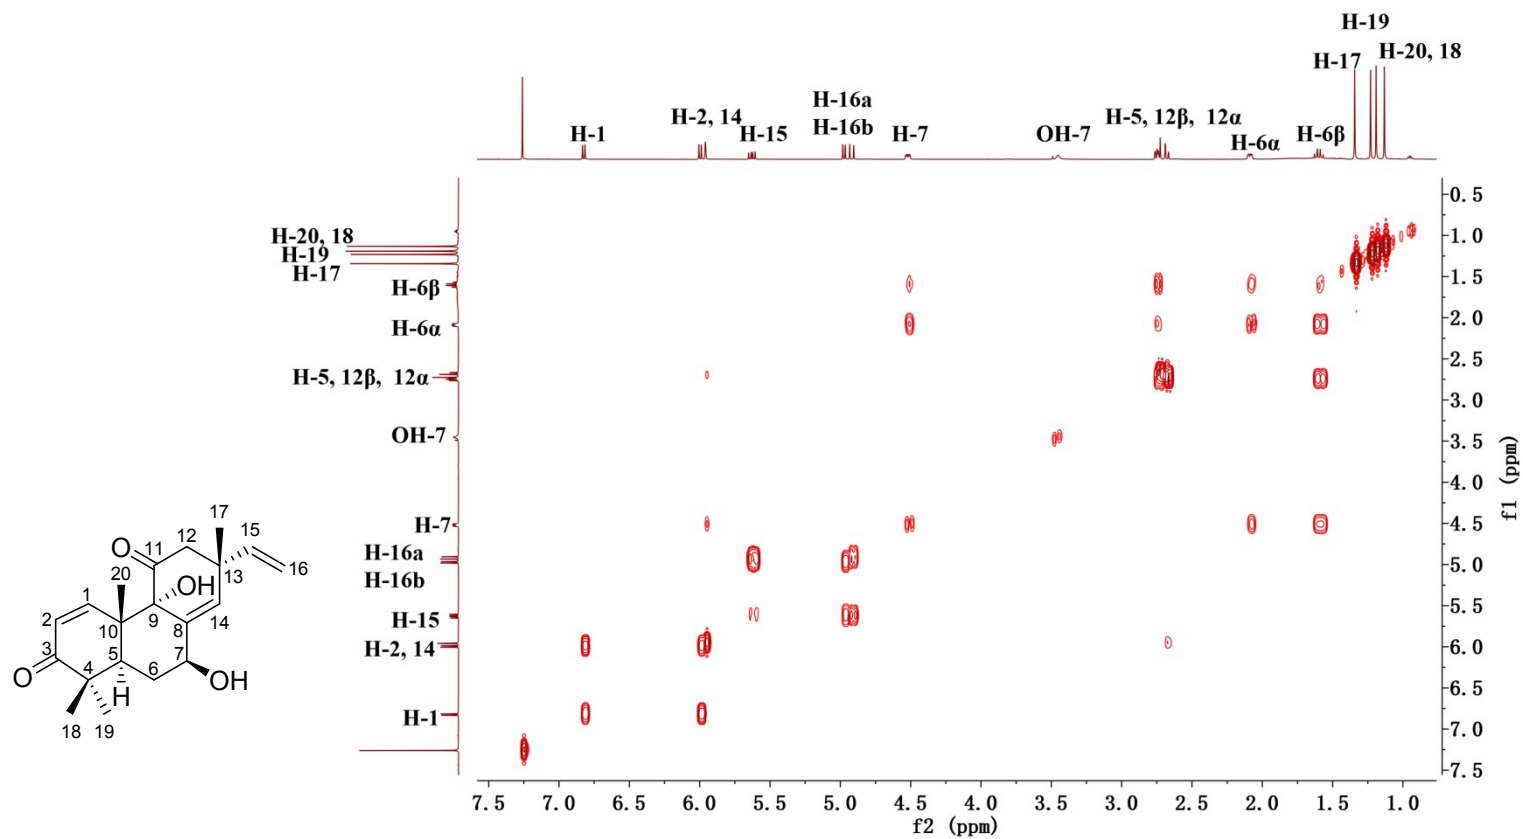

**Figure S27.** HMBC Spectrum of Sarcosenone C (**3**; 600 MHz, CDCl<sub>3</sub>)

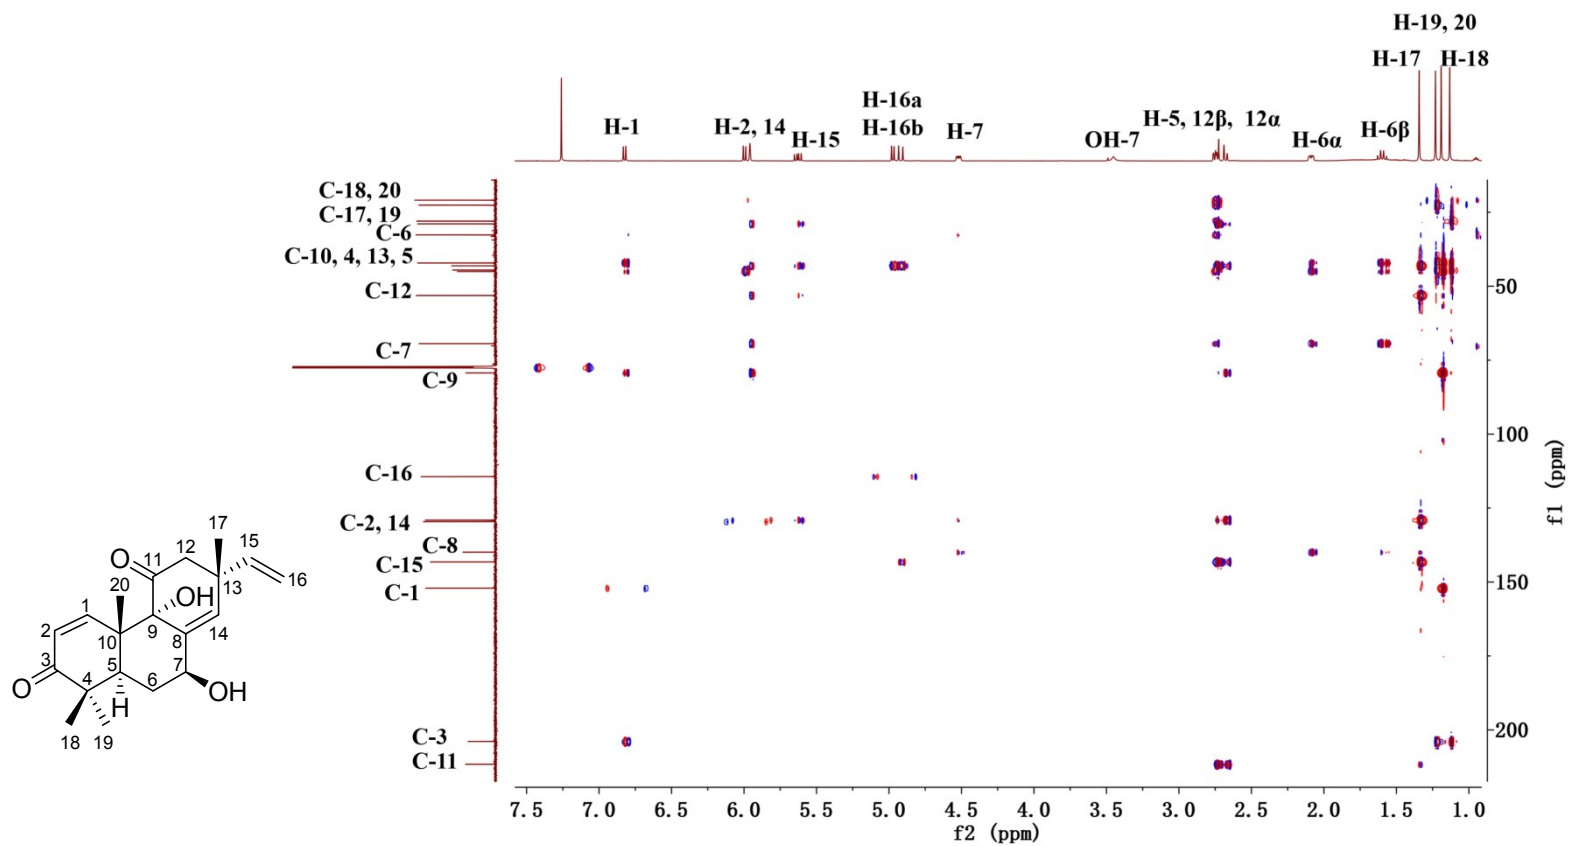

**Figure S28.** NOESY Spectrum of Sarcosenone C (**3**; 600 MHz, CDCl<sub>3</sub>)

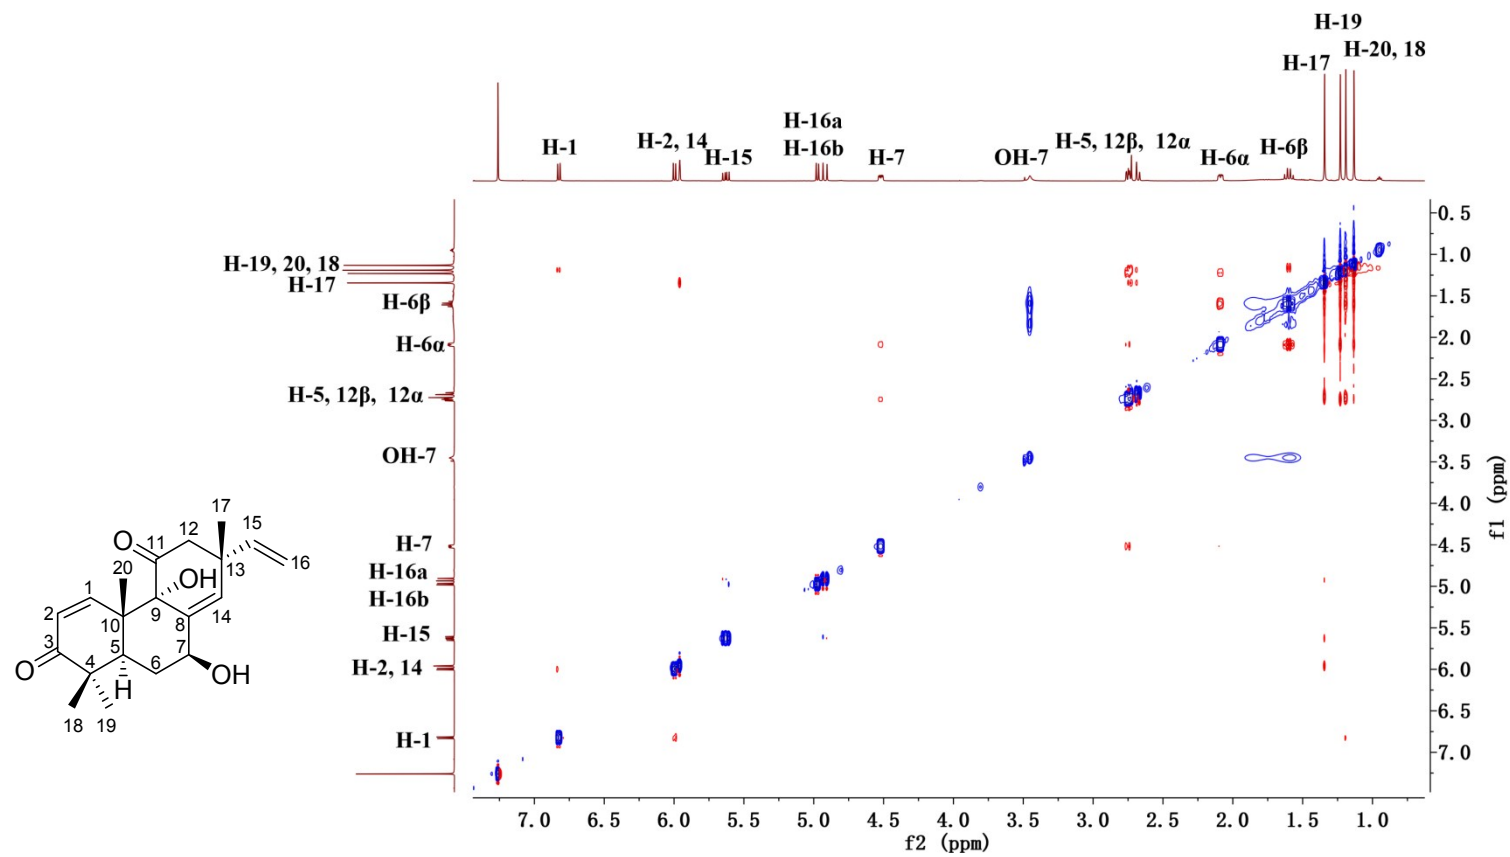

**Figure S29.** HRESIMS Spectrum of Sarcosenone C (3)

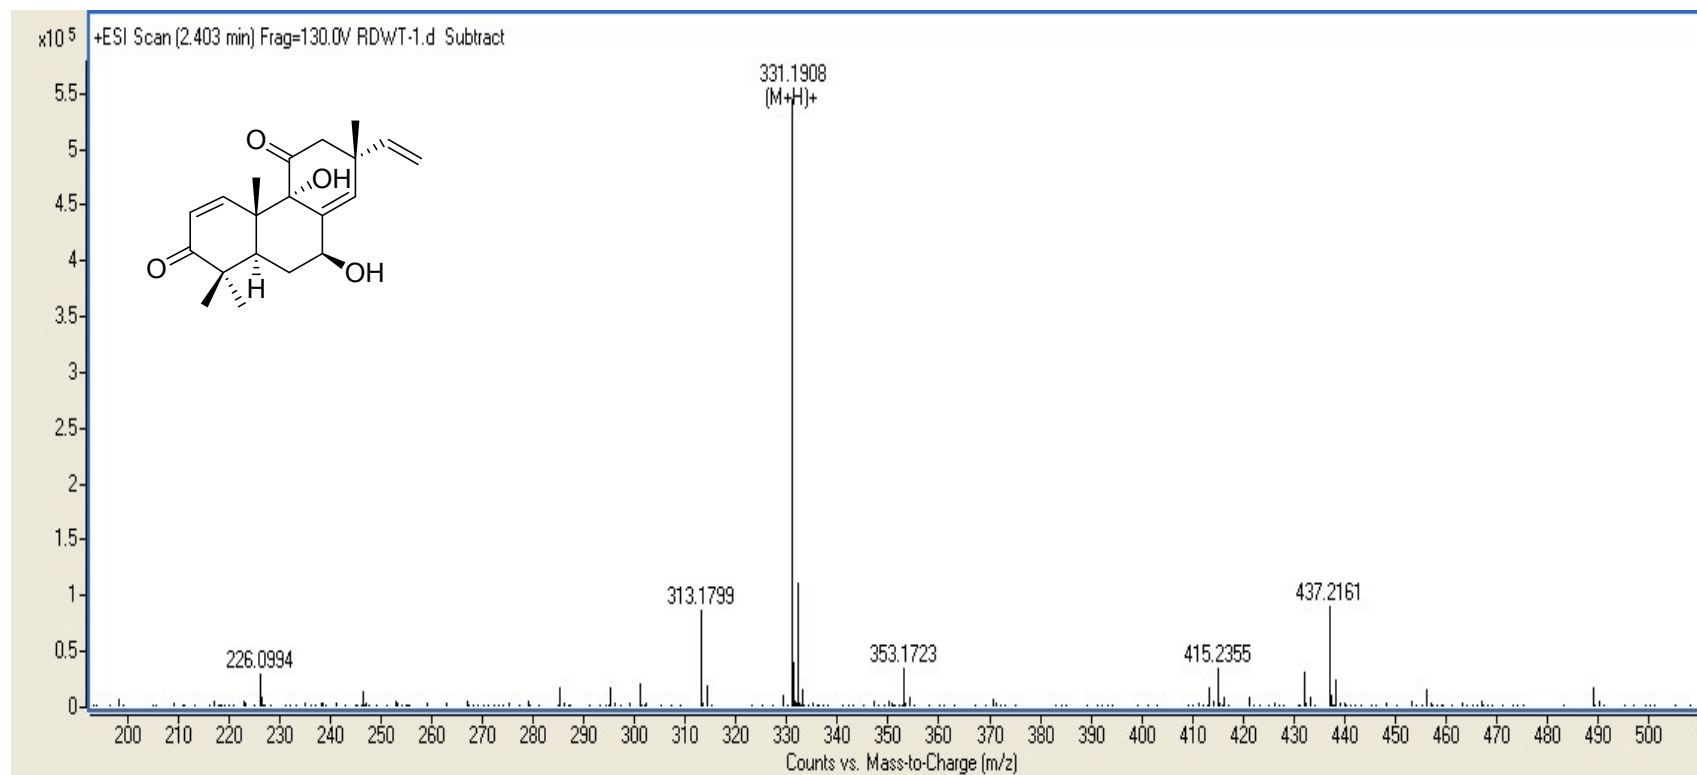

**Figure S30.** IR Spectrum of Sarcosenone C (3)

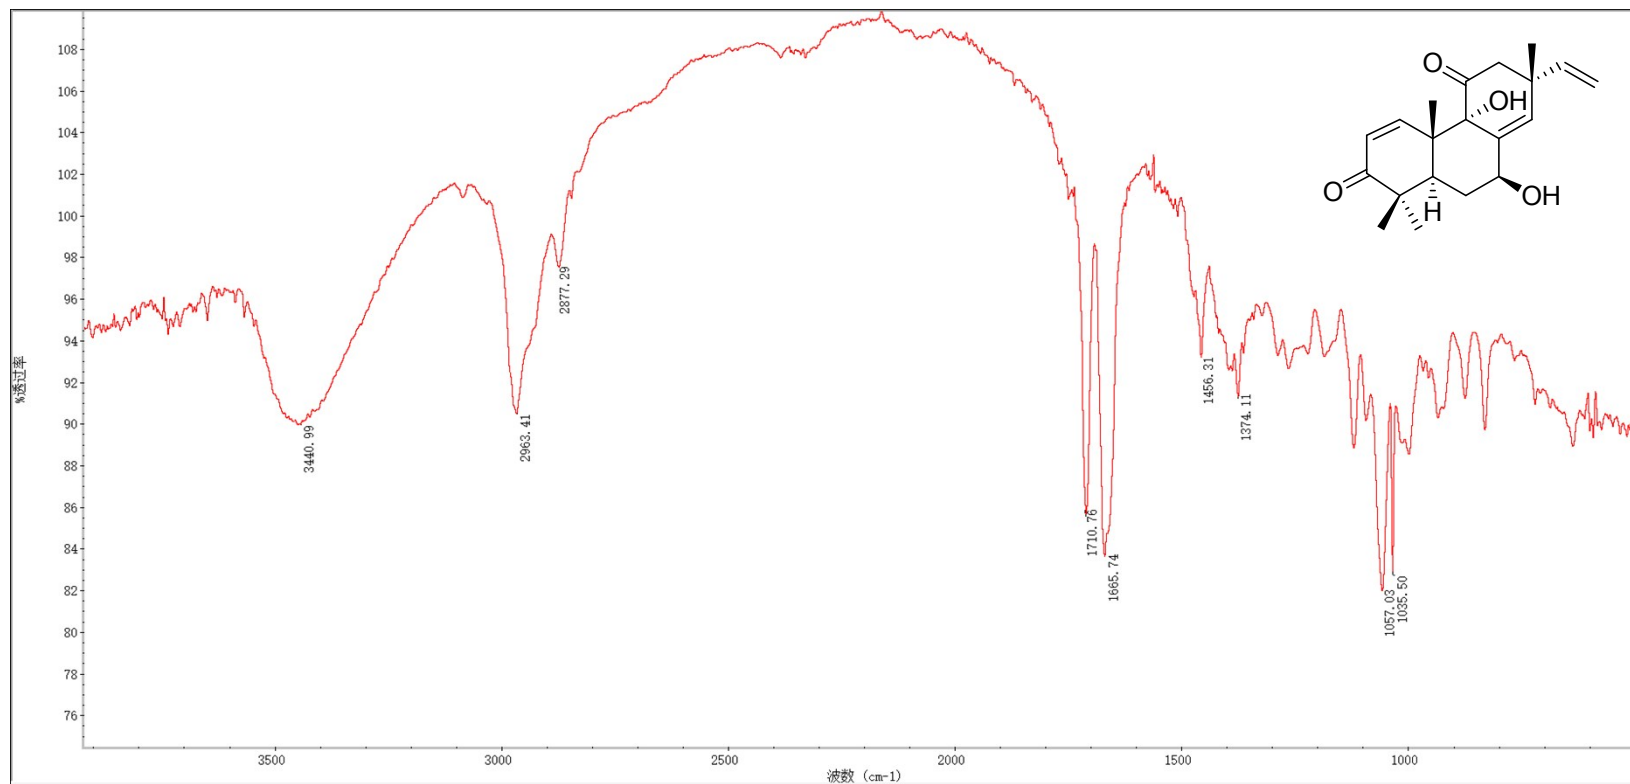

**Figure S31.** UV Spectrum of Sarcosenone C (**3**) in MeOH

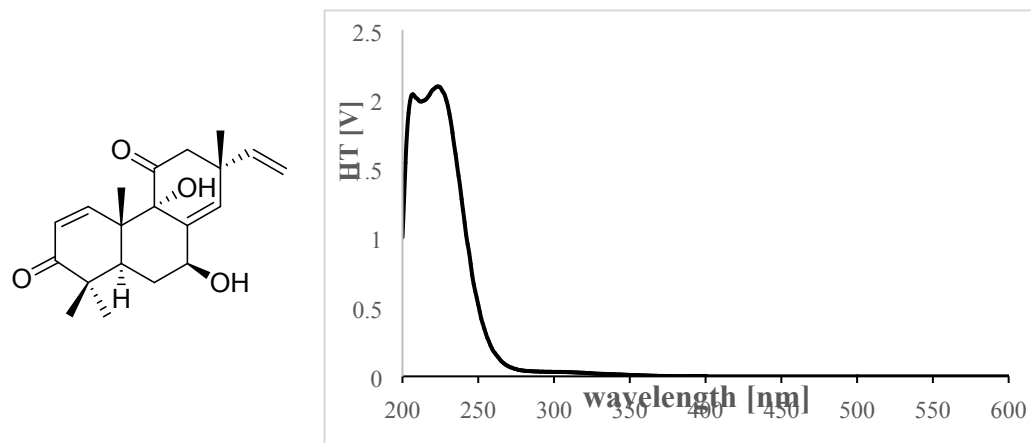

**Figure S32.** CD Spectrum of Sarcosenone C (**3**) in MeOH

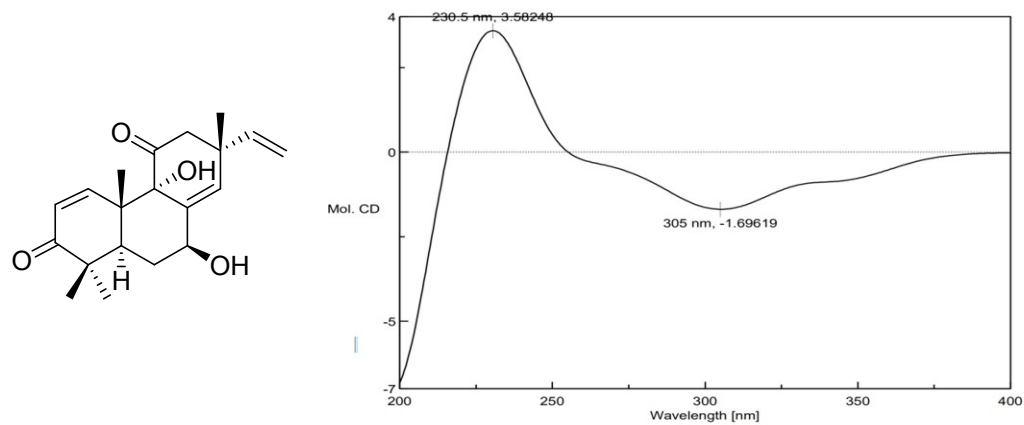



**Figure S33.** Relative Configurations and the Optimized Conformers for **3**

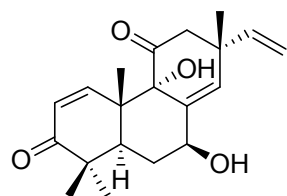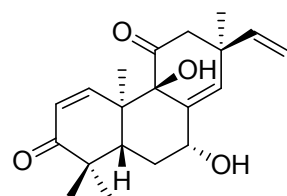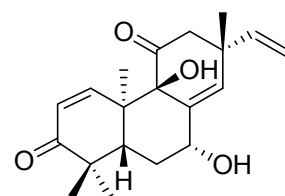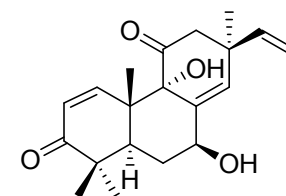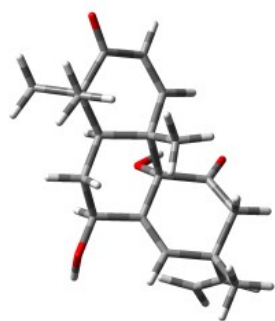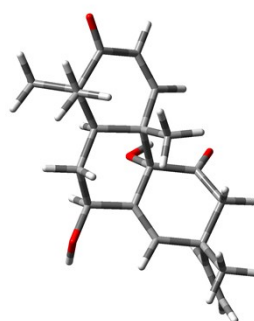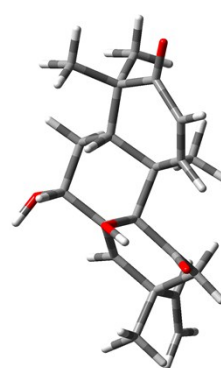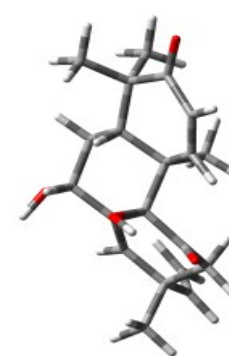

**3a**

**3b**

**3c**

**3d**

**Figure S34.** NOESY Spectrum of 9 $\alpha$ -Hydroxy-1,8(14),15-isopimaratrien-3,7,11-trione (**4**; 600 MHz, Acetone- $d_6$ )

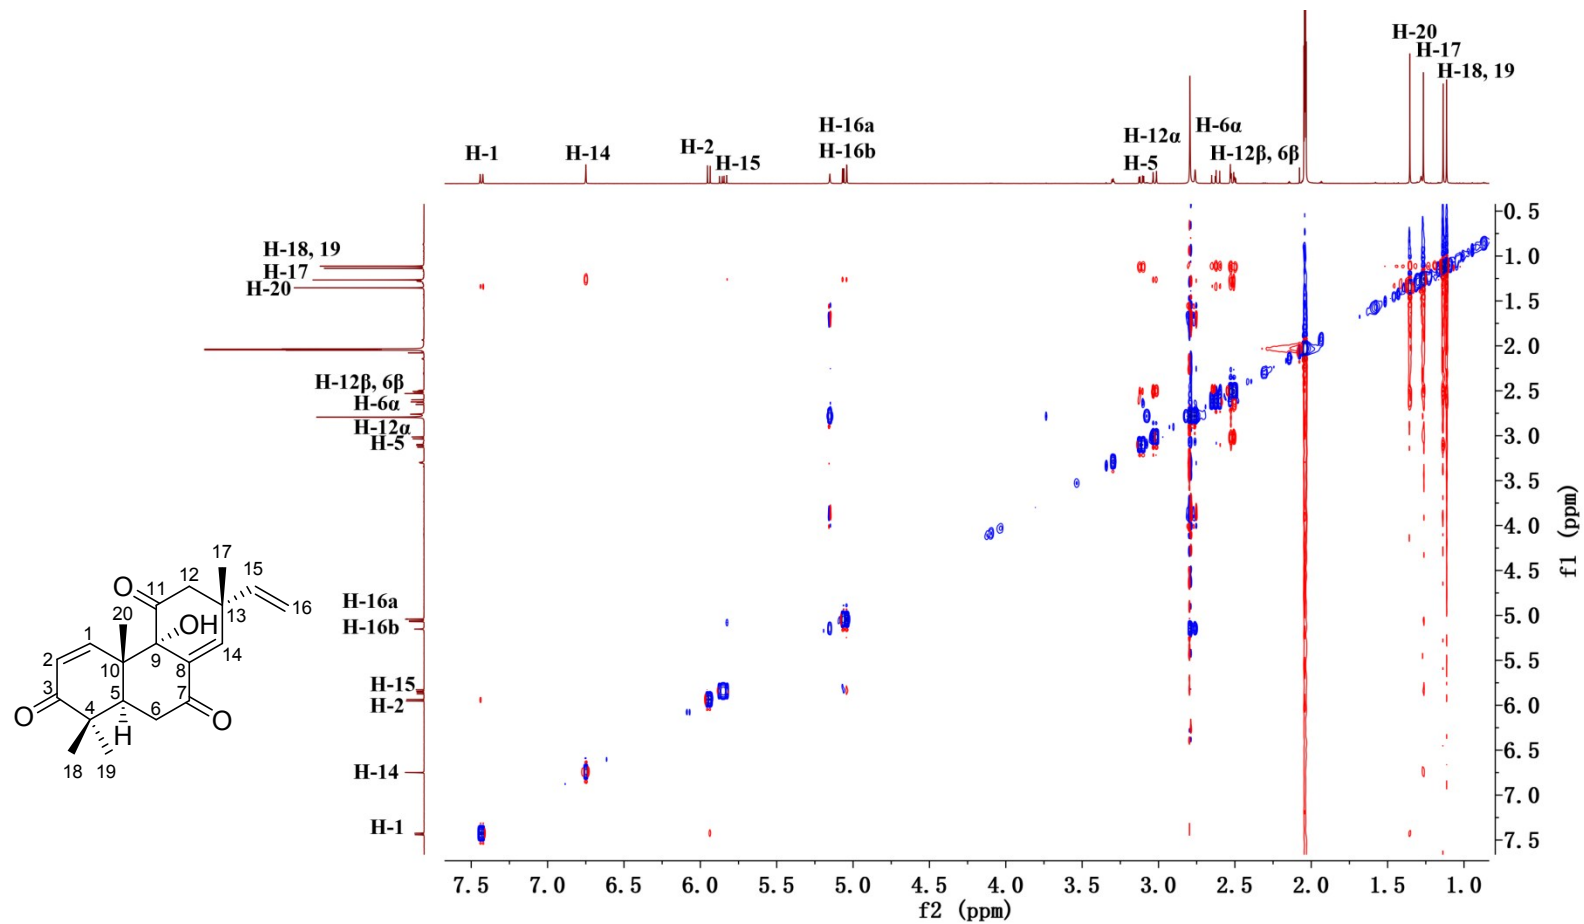

**Figure S35.** CD Spectrum of 9 $\alpha$ -Hydroxy-1,8(14),15-isopimaratrien-3,7,11-trione (**4**) in MeOH

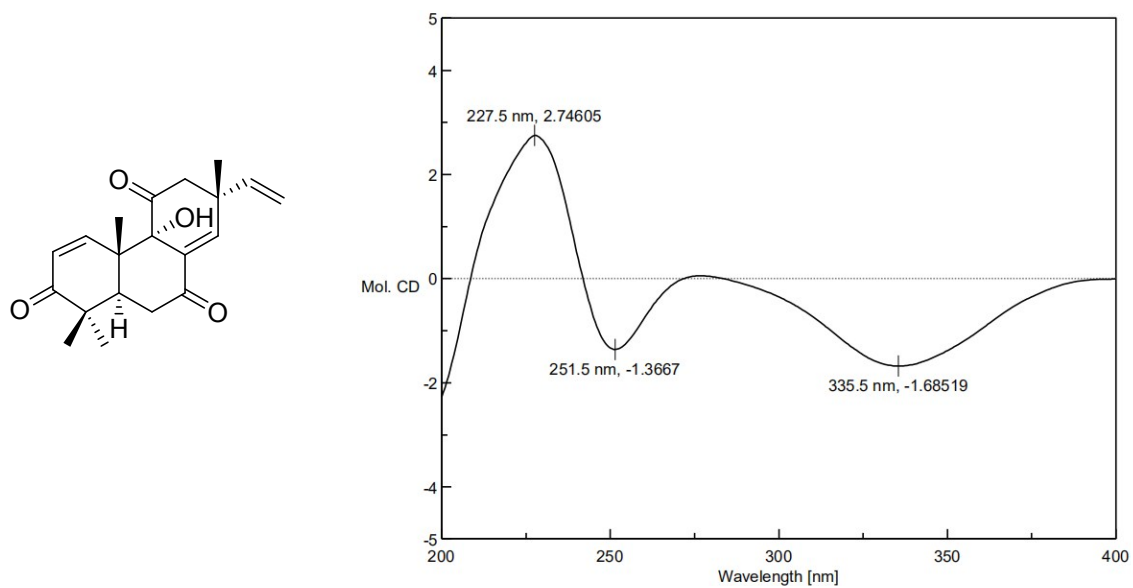

**Figure S36.** Relative Configurations and the Optimized Conformers for **4**

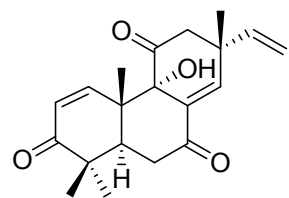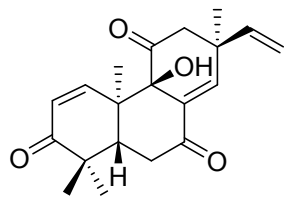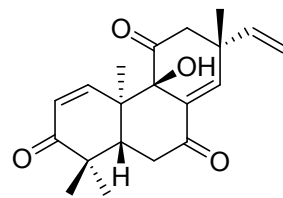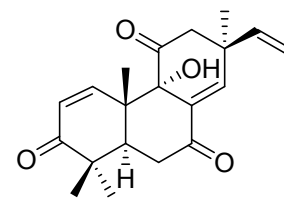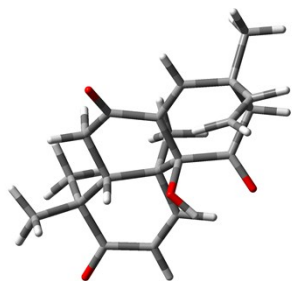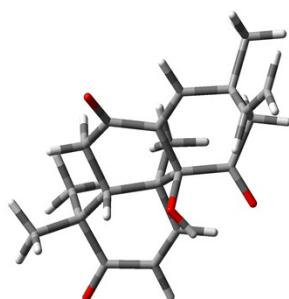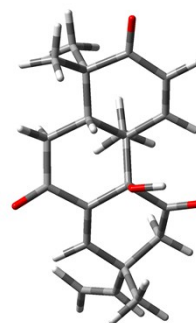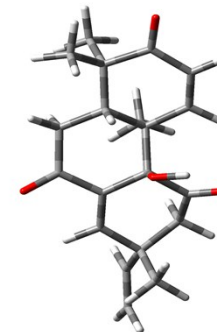

**4a**

**4b**

**4c**

**4d**

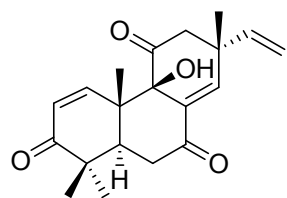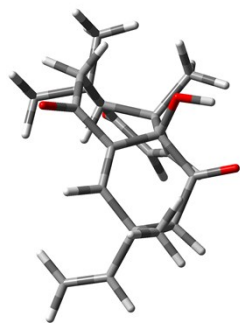

**4e**

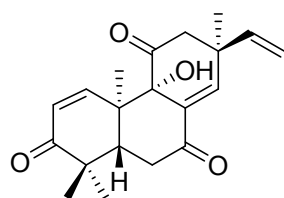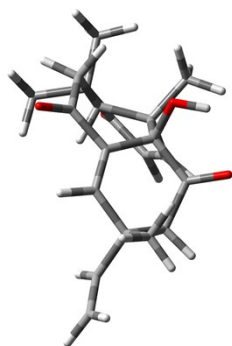

**4f**

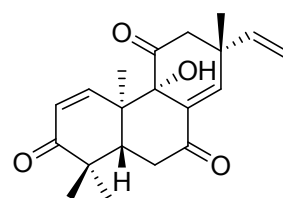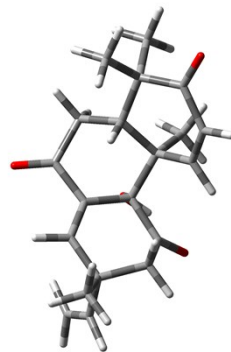

**4g**

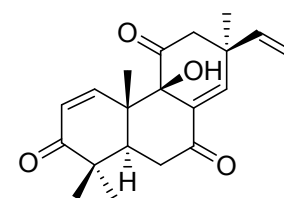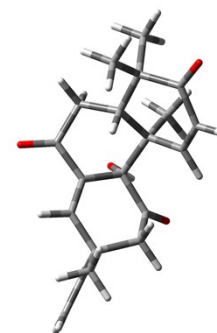

**4h**

### Scheme S1. Hypothetical Biosynthetic Pathways for 1–4

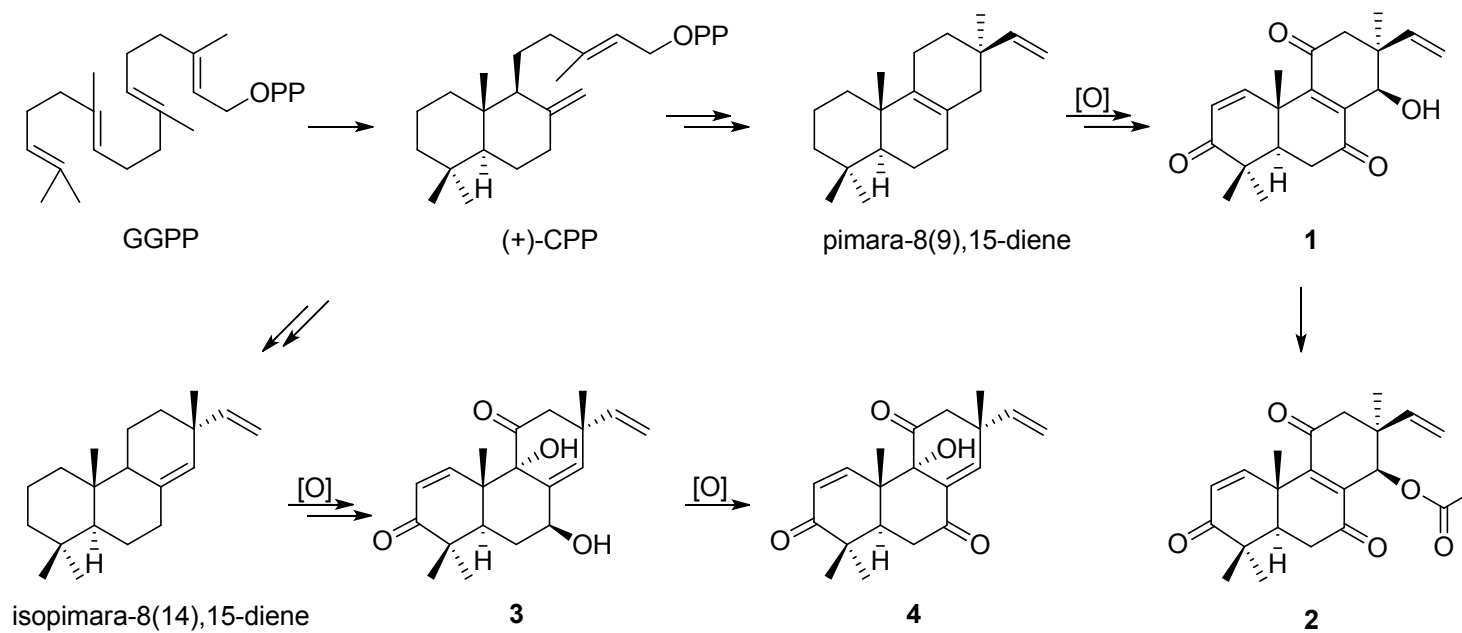

Supplement: d0ra02485f1.pdf [file d0ra02485f1.pdf]
